# Supplementary material for: GUST1.0: A GPU-accelerated 3D Urban Surface Temperature Model
Source: Copernicus journal article supplement (doi:10.5194/egusphere-2025-1485), 2025-05-19
Supplement: Supplementary file [file egusphere-2025-1485-AC2-supplement.pdf]

# **GUST1.0: A GPU-accelerated 3D Urban Surface Temperature Model**

Shuo-Jun Mei<sup>1,2\*</sup>, Guanwen Chen<sup>1,2</sup>, Jian Hang<sup>1,2</sup>, Ting Sun<sup>3</sup>

<sup>1</sup> School of Atmospheric Sciences, Sun Yat-sen University, and Southern Marine Science and Engineering Guangdong Laboratory (Zhuhai), Zhuhai 519082, PR China

<sup>2</sup> China Meteorological Administration Xiong'an Atmospheric Boundary Layer Key Laboratory, Xiong'an, P.R. China

<sup>3</sup> Department of Risk and Disaster Reduction, University College London, London, UK

*Correspondence to:* Shuo-Jun Mei ([meishj@mail.sysu.edu.cn](mailto:meishj@mail.sysu.edu.cn))

## **Abstract**

The escalating urban heat, driven by climate change and urbanization, poses significant threats to residents' health and urban climate resilience. The coupled radiative-convective-conductive heat transfer across complex urban geometries makes it challenging to identify the primary causes of urban heat and develop mitigation strategies. To address this challenge, we develop a GPU-accelerated Urban Surface Temperature model (GUST) through CUDA architecture. To simulate the complex radiative exchanges and coupled heat transfer processes, we adopt Monte Carlo method, leveraging GPUs to overcome its computational intensity while retaining its high accuracy. Radiative exchanges are resolved using a reverse ray tracing algorithm, while the conduction-radiation-convection mechanism is addressed through a random walking algorithm. The validation is carried out using the Scaled Outdoor Measurement of Urban Climate and Health (SOMUCH) experiment, which features a wide range of urban densities and offers high spatial and temporal resolution. This model exhibits notable accuracy in simulating urban surface temperatures and their temporal variations across different building densities. Analysis of the surface energy balance reveals that longwave radiative exchanges between urban surfaces significantly influence model accuracy, whereas convective heat transfer has a lesser impact. To demonstrate the applicability of GUST, it is employed to model transient surface temperature distributions at complex geometries on a neighborhood scale. Leveraging the high computational efficiency of GPU, the simulation traces  $10^5$  rays across  $2.3 \times 10^4$  surface elements in each time step, ensuring both accuracy and high-resolution results for urban surface temperature modeling.

## 28 1. Introduction

29 Urban overheating has become a pressing issue due to the combination effects of global warming,  
30 heatwaves, and rapid urbanization ([Feng et al., 2023](#)). The Urban Heat Island (UHI) effect is  
31 characterized by higher surface and air temperatures in urban areas than in surrounding rural areas, which  
32 exacerbates the urban overheating ([Manoli et al., 2019](#)). It is estimated that more than 1.7 billion people  
33 and 13,000 cities are facing urban overheating problems ([Tuholske et al., 2021](#)). Exposure to extreme  
34 urban heat poses a significant threat to residents' health, contributing to increased mortality and morbidity  
35 ([Ebi et al., 2021](#)).

36 To tackle urban overheating, a precise understanding of the factors driving excessive surface heat is  
37 essential, making accurate modeling of urban surface temperatures a critical step toward developing  
38 effective mitigation strategies. Identifying the main causes of hot urban surfaces is essential for  
39 developing effective strategies to mitigate urban overheating. Urban surface temperatures are commonly  
40 simulated with urban land surface schemes (LSMs). To capture the complex exchanges of energy and  
41 momentum within an urban environment, these schemes range from simplified approaches that represent  
42 the city as a single impervious slab to advanced frameworks that explicitly incorporate the three-  
43 dimensional geometry of buildings with varying heights and material properties. The Urban-PLUMBER  
44 project has evaluated 32 such schemes ([Grimmond et al., 2010](#); [Grimmond et al., 2011](#)), and classified  
45 them into ten categories based on the level of three-dimensional detail represented. The most detailed of  
46 these are the building-resolved schemes, which explicitly solve airflow and heat transfer while  
47 representing the full three-dimensional urban landscape.

48 Building-resolved models, such as VTUF ([Nice, 2016](#)) and computational fluid dynamics (CFD) tools  
49 ([Carmeliet and Derome, 2024](#)), solve the governing physical processes at high spatial and temporal  
50 resolution. These models are powerful tools for examining the urban thermal balance and identifying the  
51 primary drivers of urban heat

52 ~~Physics-based models are powerful tools for uncovering the urban thermal balance and identifying the~~  
53 ~~primary causes of urban heat~~ ([Carmeliet and Derome, 2024](#)). They enable a quantitative evaluation of  
54 the contribution of each process, such as conduction, radiation, and convection, to the overall thermal

balance. This is particularly important for Asia cities, which are characterized by high-density, high-rise developments and complex urban geometry. Findings from the Scaled Outdoor Measurement of Urban Climate and Health (SOMUCH) project highlight the intricate influence of building morphology on the thermal environment, especially under super-high-density conditions (Hang and Chen, 2022). These effects arise from complex three-dimensional urban landscapes, including irregular building forms and intricate shading patterns. Accordingly, models representing high-density Asian cities need greater accuracy and flexibility to account for these features.

Building-resolved Urban-urban surface temperatures are determined by the coupled heat transfer processes of conduction, radiation, and convection (Krayenhoff and Voogt, 2007). These heat transfer processes in urban areas differ from those in rural areas. First, urban materials typically have a lower heat capacity, allowing them to heat up more quickly and reach higher temperatures (Wang et al., 2018). Secondly, the complex three-dimensional geometry of urban environments leads to multiple reflections, which reduce ~~urban albedo-reflected solar radiation~~ and limit the longwave heat loss to sky (Yang and Li, 2015). Thirdly, the densely packed buildings weaken the urban wind and thus reduce the convective transfer and further limit the heat loss (Wang et al., 2021).

A well-designed ~~building-resolved urban surface temperature~~ model needs to accurately capture these heat transfer processes. Table 1 summarizes the models for urban surface temperatures and their schemes for conduction, radiation, and convection. For heat conduction, 1D models are commonly used due to the relatively thin walls of buildings in urban areas. For convective heat transfer, both parameterized convective coefficients and CFD (~~Computational Fluid Dynamics~~) simulations are commonly used. CFD simulations can better capture the spatial variations in air temperature in densely built urban areas, but the computational cost is much higher. \_-

The key distinction among these models lies in their radiation schemes, as radiation is the primary energy input into the thermal system of urban surfaces. Moreover, simulating complex urban radiative transfer requires significant computational resources, necessitating simplifications and parameterizations to make the simulation more applicable. For the radiative exchange between urban surfaces, the radiosity method is widely adopted. This approach first collects luminous energy from direct solar and diffuse sky sources

and then redistributes reflected energy according to view factors, which quantify the geometric relationships among surfaces. View factors can be determined analytically for simple geometries, estimated with the discrete transfer method (hemisphere discretization and ray counting), or calculated using Monte Carlo ray tracing (MCRT). However, the radiosity method assumes purely diffuse reflections and depends on precise view-factor calculations, making it less accurate for complex urban geometries and surfaces containing semi-transparent materials.

In contrast, the MCRT approach offers greater flexibility and has been widely employed to model solar radiation on complex urban surfaces. Table 1 shows that the radiosity method is widely used to solve the reflections. In the radiosity method, the net longwave and shortwave radiation are solved by two main steps: 1) collecting luminous energy from both the sun and the sky vault, and 2) distributing the reflected energy based on view factors. The luminous energy is influenced by the shading pattern, which is solved by two main approaches in these models: 1) Sunlit shaded distributions method, which employs ray tracing to determine whether a surface is illuminated; and 2) Flux reduction coefficients: where shading is accounted for by reducing the irradiance at shaded points. The reflection and longwave exchange between urban surfaces are determined by view factors, which can be calculated using three approaches: the analytical method, the discrete transfer method, and the Monte Carlo ray tracing method.

- ◆ The analytical method uses analytical solutions of view factors by assuming urban surfaces are composed of simple geometries.

- ◆ The discrete transfer method (DTM) uses ray tracing method to calculate view factors. The ray direction is determined by dividing the hemisphere into equal segments. This method counts the number of rays intersecting other surfaces.

- ◆ The Monte Carlo Ray Tracing (MCRT) is similar to DTM but differs by using rays that are directed randomly. This method is suitable for calculating view factors in complex geometries, but it requires a large number of rays.

The HTRDR Urban adopted a different approach, using backward MCRT, to calculate the solar radiation considering multiple reflections (Schoetter et al., 2022). The Monte Carlo method (MCM) has been



109 ~~widely used to model solar radiation through the application of a ray tracing algorithm~~ ([Kondo et al.,](#)  
110 [2001](#)). ~~More recently, its use has expanded beyond radiative transfer to encompass coupled conduction,~~  
111 ~~convection, and radiation processes~~ ~~Recently, its application has been extended to address conduction,~~  
112 ~~convection, and radiation problems~~ ([Villefranque et al., 2022](#)). In backward MCRT, the energy of the  
113 incident light is divided into a large number of photons. By tracking the path of these photons and  
114 counting the number of photons absorbed, the net solar radiation reaching a given surface can be  
115 calculated. ~~For example, The HTRDR-Urban adopted a different approach, using the backward MCRT,~~  
116 ~~to calculate the solar radiation considering multiple reflections~~ ([Schoetter et al., 2023](#)). ~~Building on this~~  
117 ~~concept,~~ [Tregan et al. \(2023\)](#) proposed a theoretical framework to solve linearized transient conduction-  
118 radiation problems with Robin's boundary condition in complex 3D urban geometry. Based on ~~this-that~~  
119 framework, [Caliot et al. \(2024\)](#) developed a probabilistic model to simulate urban surface temperatures,  
120 using ray-tracing, walk-on-sphere and double randomization techniques. Their model leverages  
121 advancements in computer graphics for image synthesis and the ~~Monte Carlo method (MCM)~~, enabling  
122 it to effectively handle large and complex 3D geometries.

123 ~~The MCRT method has demonstrated strong capability for accurately modeling coupled heat and~~  
124 ~~radiation processes in complex urban environments, but its high computational cost and low efficiency~~  
125 ~~currently limit its application to real-world urban configurations. Although several models listed in Table~~  
126 ~~1 have been validated against field measurements, others remain unverified and rely on various~~  
127 ~~assumptions and parameterizations, which reduces confidence in their accuracy. Furthermore, the use of~~  
128 ~~field measurement data for model validation faces persistent challenges.~~ ~~The advantage of MCM is its~~  
129 ~~ability to handle complex geometries and albedos, while the disadvantage is its high computational cost.~~  
130 ~~The low computational efficiency limits the application of MCM in real urban configurations. Although~~  
131 ~~some models in Table 1 are validated against field measurements, others remain unvalidated. These~~  
132 ~~models rely on various assumptions and parameterizations, and the lack of validation limits their accuracy.~~  
133 ~~Additionally, using field measurement data to validate numerical models faces several challenges: 1)~~  
134 limited test points due to regulatory constraints and installation difficulties, 2) uncertainty in infrared  
135 imagery caused by varying view angles, and 3) heterogeneity in the optical and thermal properties of  
136 building materials.

137 This study aims to develop a GPU-~~accelerated~~based Urban Surface Temperature (GUST) model to  
138 enhance the computational speed of Monte Carlo Method. The model is designed to operate at the  
139 neighborhood scale and to capture microscale processes, including complex shading patterns, multiple  
140 reflections of solar radiation, and longwave radiative exchanges between building surfaces and the  
141 ground. The ultimate objective is to identify the physical drivers of extreme heat in high-density urban  
142 neighborhoods. –The absorption and reflection of longwave and ~~shortwaves~~solar radiation on outdoor  
143 surfaces modeled using the reverse Monte Carlo ray tracing (rMCRT) algorithm. The resulting  
144 ~~shortwaves~~solar and longwave radiation are then treated as heat flux boundary conditions for the 1D heat  
145 conduction model, which employs the Monte Carlo random walk method to calculate surface  
146 temperatures. High spatial-temporal resolution surface temperature data from a scaled measurement  
147 (SOMUCH) is employed to validate the parameterization and assumptions in this model.

148 The paper is organized as follows. Sect. 2 outlines the model structure and describes the algorithms used  
149 for the submodels. Sect. 3 presents the validation and evaluation of the model by comparing it with  
150 experimental data. Sect. 4 includes an example demonstrating how the model can be applied to complex  
151 geometries. Sect. 5 discusses the applications, limitations, and future development of the model. Lastly,  
152 Sect. 6 provides the conclusions.

153

154 **Table 1.** Overview of building-resolved models for urban surface temperature. The view factors are  
 155 solved by both DTM (Discrete transfer method), analytical model, and Monte Carlo ray tracing method.

| Model                                                                | Solar Irradiation                | Reflections and longwave exchange                 | Conduction                  | Convection              | Validation                                                        |
|----------------------------------------------------------------------|----------------------------------|---------------------------------------------------|-----------------------------|-------------------------|-------------------------------------------------------------------|
| <b>HTRDR-Urban</b><br>( <a href="#">Schoetter et al., 2023</a> )     | Backward Monte Carlo ray tracing | Backward Monte Carlo ray tracing                  | Monte Carlo random walking  | Parameterized           | N.A.                                                              |
| <b>MUST</b> ( <a href="#">Yang and Li, 2013</a> )                    | Sunlit-shaded distributions      | Radiosity Method, DTM view factors                | 1D heat conduction          | Parameterized           | Thermal scanner and IRT ( <a href="#">Voogt and Oke, 1998</a> )   |
| <b>TUF-3D</b><br>( <a href="#">Kravenhoff and Voogt, 2007</a> )      | Sunlit-shaded distributions      | Radiosity Method, analytical view factors         | 1D heat conduction          | Parameterized           | Thermal scanner and IRT ( <a href="#">Voogt and Oke, 1998</a> )   |
| <b>SOLENE Microclimat</b><br>( <a href="#">Imbert et al., 2018</a> ) | Sunlit-shaded distributions.     | Radiosity Method, analytical view factors         | 1D heat conduction          | Coupling CFD simulation | Thermographies measurement ( <a href="#">Hénon et al., 2012</a> ) |
| <b>Envi-Met</b><br>( <a href="#">Eingrüber et al., 2024</a> )        | Flux reduction coefficients      | Radiosity Method, DTM view factors                | 1D heat conduction          | Coupling CFD simulation | Field measurements ( <a href="#">Forouzandeh, 2021</a> )          |
| <b>uDALES</b><br>( <a href="#">Owens et al., 2024</a> )              | Sunlit-shaded distributions      | Radiosity Method, DTM view factors                | 1D heat conduction          | Coupling CFD simulation | N.A.                                                              |
| <b>PALM</b> ( <a href="#">Resler et al., 2017</a> )                  | Sunlit-shaded distributions      | Radiosity Method, Analytical and DTM view factors | Empirical heat conductivity | Coupling CFD simulation | Field measurement ( <a href="#">Resler et al., 2017</a> )         |
| <b>MITRAS</b><br>( <a href="#">Salim et al., 2018</a> )              | Meso-scale radiation scheme      | Meso-scale radiation scheme (METRAS)              | Force-restore method        | Coupling CFD simulation | N.A.                                                              |
| <b>OpenFOAM</b><br>( <a href="#">Rodriguez et al., 2024</a> )        | Sunlit-shaded distributions      | Radiosity Method, DTM view factor                 | 1D heat-moisture diffusion. | Coupling CFD simulation | N.A.                                                              |
| <b>FLUENT</b><br>( <a href="#">Toparlar et al., 2015</a> )           | Sunlit-shaded distributions      | Radiosity Method, DTM view factor                 | Shell conduction            | Coupling CFD simulation | Field measurement ( <a href="#">Toparlar et al., 2015</a> )       |

156

## 2. Model design

GUST aims to resolve the urban surface temperature by a transient heat conduction model, as illustrated in Fig. 1. The convective and radiative heat transfer at urban surfaces is treated as boundary conditions for the 1D heat conduction model. For the outdoor side, the heat flux ( $q_{out}$ ) is the sum of radiative (longwave  $q_l$  and solar  $q_s$ ) and convective heat flux ( $q_{c,out}$ ).

$$q_{out} = q_l + q_s + q_{c,out} \quad (1)$$

The absorbed solar radiation,  $q_s$  is the sum of direct solar irradiation ( $q_{s,o}$ ) and diffuse solar irradiation ( $q_{s,r}$ ), expressed by:  $q_s = q_{s,o} + q_{s,r}$ . The longwave radiation flux  $q_l$  includes the radiation between urban surfaces ( $q_{l,urban}$ ) and between urban surfaces and the sky ( $q_{l,sky}$ ), represented as  $q_l = q_{l,urban} + q_{l,sky}$ .

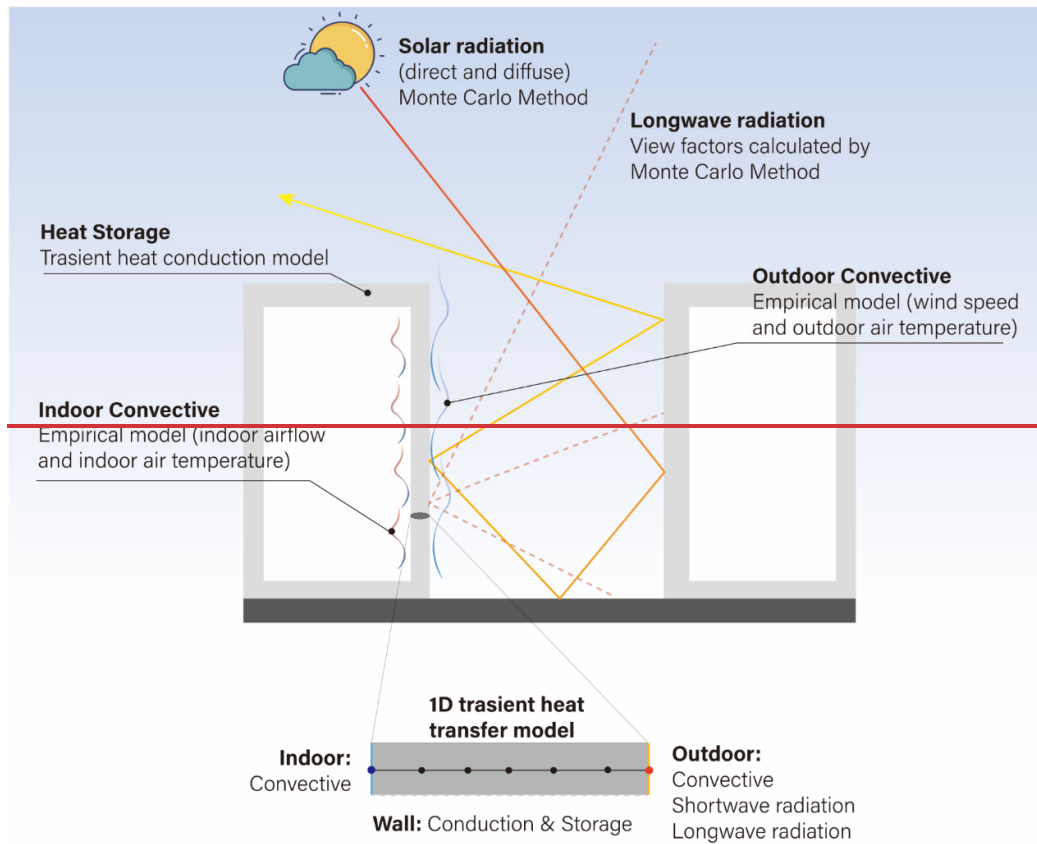

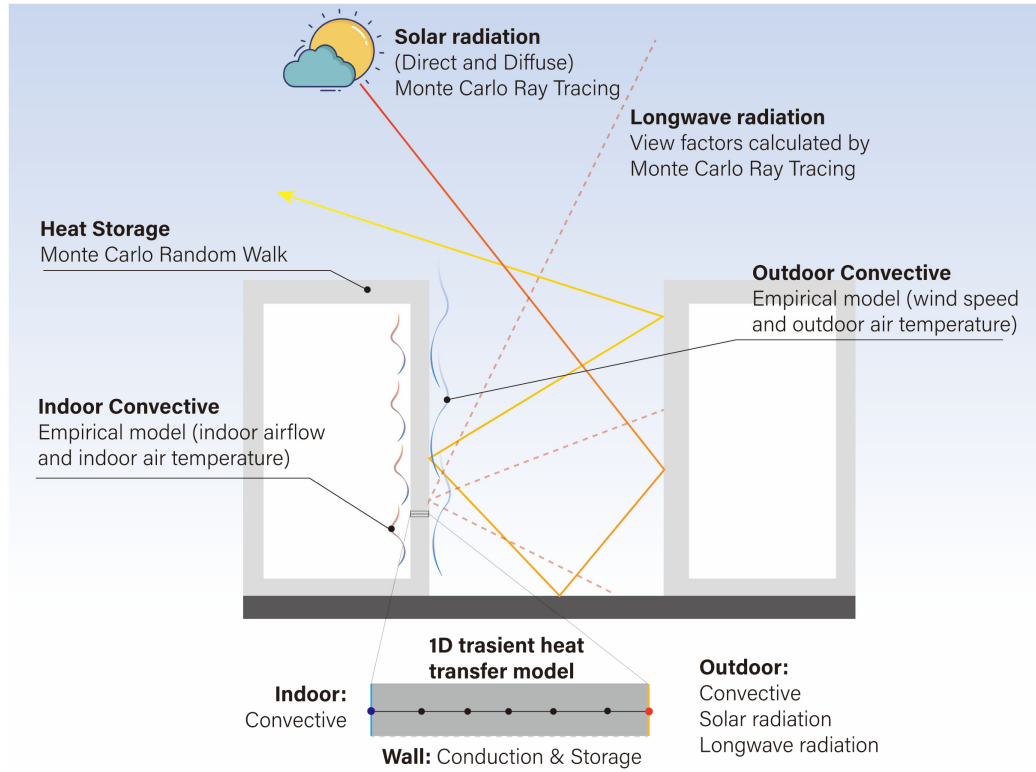

**Figure 1: The model design of GUST. In this model, 1D transient conductive heat transfer is considered for urban surfaces the system (e.g., walls, roofs, and ground). They are composed of multiple layers where the thermal properties are uniform and isotropic. All urban surfaces are assumed to be opaque in this study.**

In this model, all urban surfaces are represented as triangular facets in STL format, with each triangular facet treated as a single element. Ray tracing and heat-conduction calculations are performed at the centroid of each element. The spatial resolution of the simulation can be refined by using smaller triangular facets, thereby increasing the number of elements. Fig. 6 illustrates the triangulated representation of the urban surfaces.

## 2.1. Conduction sub-model

The Monte Carlo random walking method is used to solve the 1D heat conduction (Talebi et al., 2017). Compared to finite volume method, this approach is insensitivity to the complexity of urban geometry and boundary conditions (Villefranque et al., 2022; Caliot et al., 2024). In the present version, the heat

182 conduction along the wall span is neglected. The one-dimensional (1D) transient heat conduction  
 183 equation is:

$$184 \quad \frac{\partial}{\partial t} T = \alpha \frac{\partial^2 T}{\partial x^2} \quad (2)$$

185 where  $\alpha = \frac{k}{\rho c_p}$  is the solid thermal diffusivity and  $k$  the thermal conductivity,  $\rho$  the density,  $c_p$  the  
 186 specific heat capacity. The ground, walls and roofs are composed of multiple layers. In the Monte Carlo  
 187 random walking method, the heat conduction equation is replaced by finite difference approximation as:

$$188 \quad T(x, t + \Delta t) = P_t T(x, t) + P_{x-} T(x - \Delta x, t + \Delta t) + P_{x+} T(x + \Delta x, t + \Delta t) \quad (3)$$

189 where  $P_t = \frac{1}{1+2Fo}$  is defined as probability of time step;  $P_{x-} = P_{x+} = \frac{Fo}{1+2Fo}$ . where  $P_{x-}$  and  $P_{x+}$   
 190 respectively represent the probabilities of stepping to the points  $(x - \Delta x, t)$  and  $(x + \Delta x, t)$ . Here,  
 191  $Fo = \frac{k \Delta t}{\rho c_p (\Delta x)^2}$  These coefficients are nonnegative probabilistic values and

$$192 \quad P_t + P_{x-} + P_{x+} = 0 \quad (4)$$

193 The Monte Carlo random walking algorithm is schematically illustrated in Fig. 2. The core idea is that  
 194 particles walk by following rules:

- 195 1) Start a random walk at point  $x$ .
- 196 2) Generating a random number (R) between 0 and 1.
- 197 3) Determine walking direction by conditions

$$198 \quad \begin{cases} 0 < R < P_{x-}: & x \rightarrow (x - \Delta x) \\ P_{x-} < R < (P_{x-} + P_{x+}): & x \rightarrow (x + \Delta x) \\ (P_{x-} + P_{x+}) < R: & x \rightarrow (x), T(i) = T(i) + T(x, t - \Delta t) \end{cases} \quad (5)$$

- 199 4) If the next point is not on the boundary repeat step 2 and 3 and if it is on the boundary, record  $T(i) =$   
 200  $T(i) + T$  at the boundary and go to step 1.

- 201 5) After  $N$  random walking, temperature at point  $x$  is calculated by

$$202 \quad T(x) = \frac{T(i)}{N} \quad (6)$$

203 When a particle reaches a heat flux, convective or interface boundary, its movement follows the following  
 204 rules.

205 1) Heat flux boundary

206 When the particle walks to the boundary of heat flux ( $q$ ), it is bounced back and record the temperature

207  $T_{hf}$ , which is calculate by  $T_{hf} = \frac{q\Delta x}{k} + \frac{q}{2k}(\Delta x)^2$ .

208 2) Convective boundary

209 The heat flux of a convective boundary is calculated by  $q = h(T_w - T_a)$ , where  $h$  is the heat transfer  
 210 coefficient and  $T_w$  the wall temperature and  $T_a$  the air temperature. The wall temperature is calculated  
 211 by

$$212 \quad T_w = \frac{1}{1 + Bi} T(x - \Delta x) + \frac{Bi}{1 + Bi} T_a \quad (7)$$

213 Where  $P_x = \frac{1}{1 + Bi}$ ,  $P_a = \frac{Bi}{1 + Bi}$ ,  $Bi = \frac{h\Delta x}{k}$ . When the particle reaches the convective boundary, a new  
 214 random number  $R$  was generated and moves as follows:

$$215 \quad \begin{cases} 0 < R < P_x : & \rightarrow \text{bounced back} \\ P_x < R < 1 : & \rightarrow \text{absorbed by air with } T(i) = T(i) + T_a \end{cases} \quad (8)$$

216 3) Interface between two layers

217 The interface between layers is flux continuity, i.e. the conductive fluxes are equal on both sides of the  
 218 interface. The heat conductivities on left and right sides of the interface are  $k_A$  and  $k_B$ . The conductive  
 219 heat fluxes on both sides are equal, i.e.,  $-k_A \frac{dT}{dx} = -k_B \frac{dT}{dx}$ . When a particle reaches the interface, it may  
 220 be reflected or move to the next layer. A new random number  $R$  is generated. The particle moves by  
 221 following

$$222 \quad \begin{cases} 0 < R < P_{x-} : & \rightarrow \text{bounced back to layer A} \\ P_{x-} < R < 1 : & \rightarrow \text{move to layer B} \end{cases} \quad (9)$$

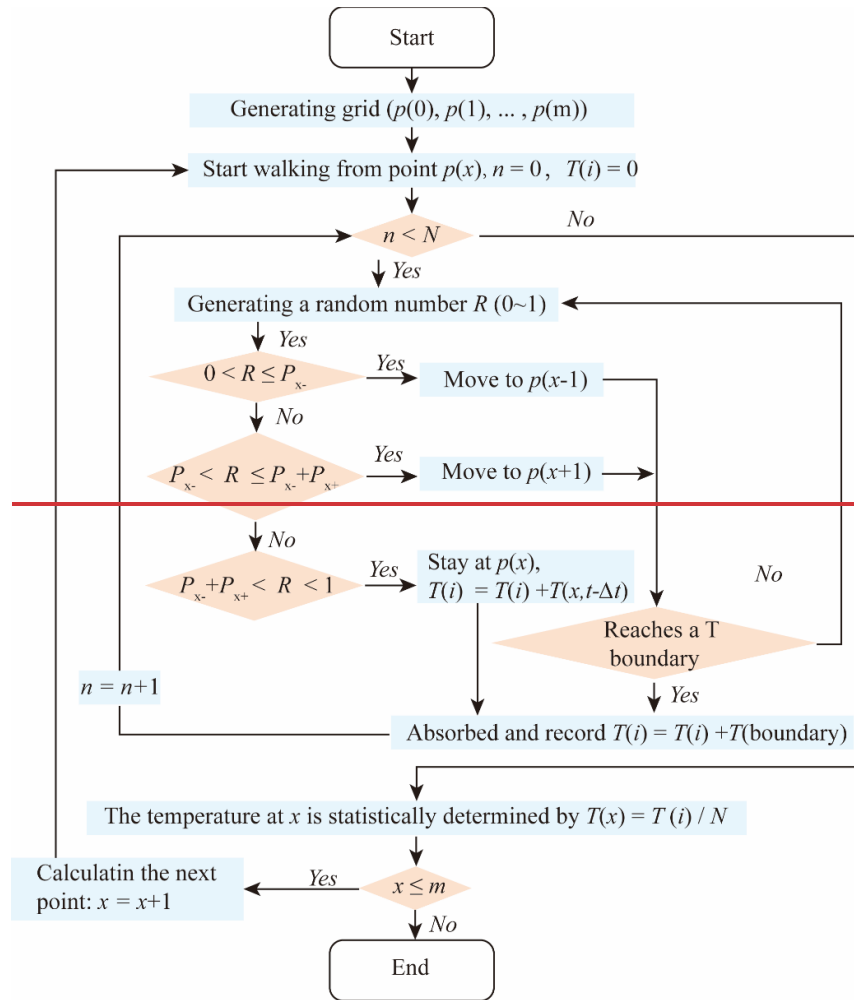



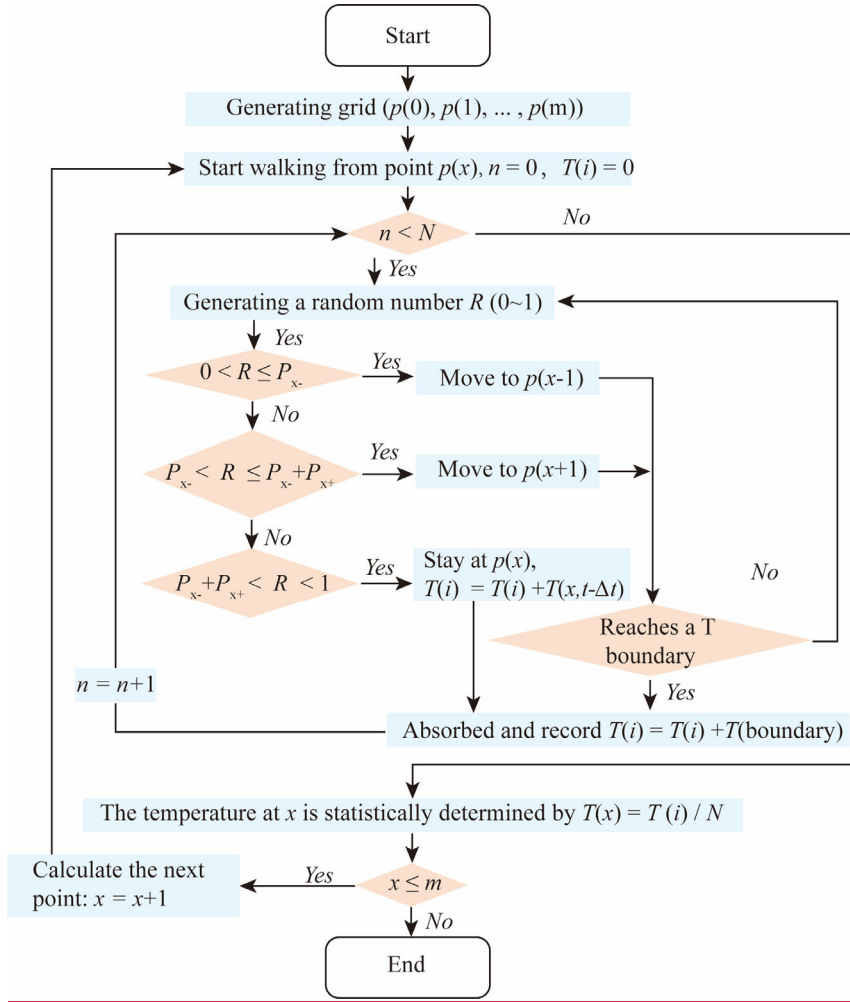

**Figure 2: Flowchart of the Monte Carlo random walking algorithm for 1D heat conduction.** At each point, the particle movement stops after  $N$  random walks. Each walk stops when particle either reaches a fixed temperature boundary or remains stationary. Orange diamonds indicate decision points with two possible outcomes (Yes/No).

## 2.2. Solar radiation sub-model

The solar radiation  $q_s$  is calculated on each triangular facet using the reverse Monte Carlo Ray Tracing (rMCRT) method, which inherently accounts for both shaded and sunlit areas. The reverse Monte Carlo Ray Tracing (rMCRT) method is used to calculate the solar radiation  $q_s$  and longwave radiation  $q_l$ . In the rMCRT, the ray starts from the target points, instead of starting from the sky or sun in the ray tracing method (Caliot et al., 2024). This method ensures that enough photons reach the target point to

235 obtain a statistical result.

236

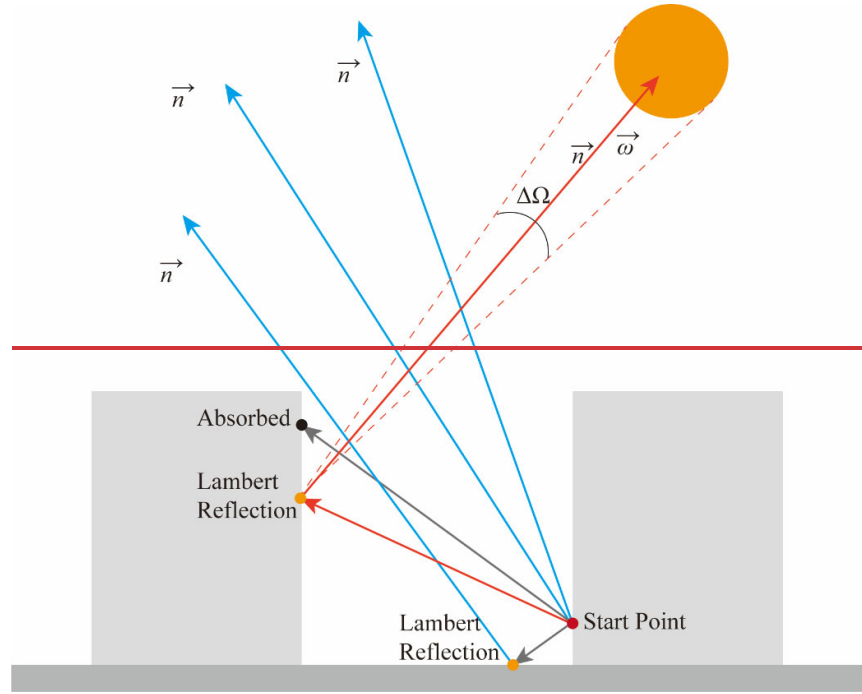

237

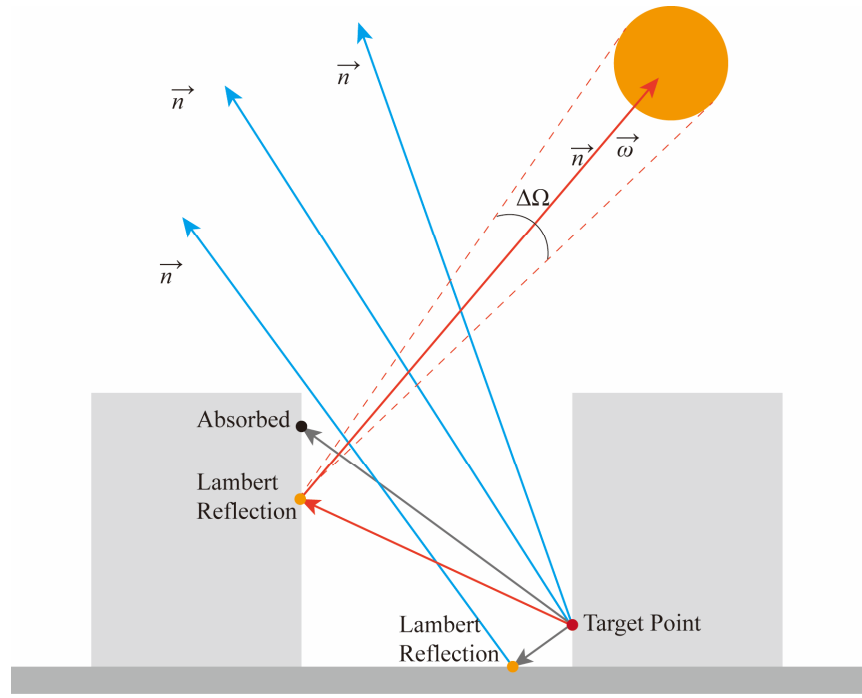

238 **Figure 3: Schematic illustration of the reverse MCM ray tracing method for calculating the directional and**  
239 **diffuse solar radiation.**

240 The procedure of reverse ~~MCM-MCRT~~ is schematically explained in Fig. 3. In total,  $N$  photons leave  
 241 the target point in random directions ( $\vec{r}$ ), which is determined by the azimuth  $\theta_a$  and incidence angle  
 242  $\eta_a$ . These angles are calculated by  $\theta_a = 2\pi R_1$  and  $\eta_a = \arccos(1 - 2R_2)$ , where  $R_1$  and  $R_2$  are  
 243 random numbers between 0 and 1.

244 When a photon reaches the surface, it can be absorbed or reflected via Lambert's law. To determine  
 245 whether this photon is absorbed, a random number  $R_{ab}$  (ranging from 0 ~ 1) is generated. When  $R_{ab} >$   
 246  $\alpha_s$  (surface albedo), the photon is absorbed by the surface. When  $R_{ab} < \alpha_s$ , the photon is reflected. All  
 247 surfaces are considered Lambertian and the direction of reflect solar beam is determined by the azimuth  
 248  $\theta_a$  and incidence angle  $\eta_a$  of that surface. At each reflection,  $\theta_a$  and  $\eta_a$  are recalculated by  
 249 regenerating new random numbers.

250 When the photon reaches the “sky” in the direction of  $\vec{r}$ , its angle ( $\theta_{ns}$ ) with the reverse solar direction  
 251  $\vec{\omega}_{sun}$  is calculated. When  $\theta_{ns} < \Delta\Omega_d$ , that photon is marked as reaching the “Sun”, otherwise, that  
 252 photon is marked as reaching the “Sky”. The direct ( $q_{s,o}$ ) and diffuse ( $q_{s,r}$ ) solar radiation reaching the  
 253 target point can then be statistically determined by:

$$254 \quad q_{s,o} = \frac{\pi I_{s,o}}{\Delta\Omega_d N} \sum_{\theta_{ns} < \Delta\Omega_d} |\vec{\omega}_{sun} \cdot \vec{n}| \quad (10)$$

$$255 \quad q_{s,r} = \sum_{\theta_n > \Delta\Omega_d} \frac{I_{s,r}}{N} \quad (11)$$

256 where  $I_{s,o}$  and  $I_{s,r}$  is the ~~downward-direct normal irradiance direction~~ and diffuse solar radiation. The  
 257 ratio between the directional and diffuse solar radiation is calculated by the model proposed by (Reindl  
 258 [et al., 1990](#)).

259 The rMCRT requires a large number of rays to achieve statistically reliable results. To accelerate the  
 260 simulation, the model is run in parallel on GPUs (Graphics Processing Units) using the CUDA® platform  
 261 (Yoshida et al., 2024). The advantage of GPUs is that they have a large number of cores, which enables  
 262 them to handle many parallel tasks simultaneously. GPUs are particularly well-suited for accelerating  
 263 MCRT, since each ray tracing operation is independent.

264 The GPU parallel computing is executed using two strategies, depending on the total number of elements.

265 ~~based on the number of elements and points.~~ As illustrated in Fig. 4, Strategy 1 calculates the radiative  
 266 flux point by point, emitting  $n$  photons for ray tracing simulation. Each photon is processed in a separate  
 267 GPU core. Once the ray tracing process is complete, the results from the GPU cores are copied to the  
 268 CPU, where radiative flux at each point is calculated. Strategy 2 calculates the radiative flux for all points  
 269 simultaneously, with each GPU core computing the flux for a single point. The ray tracing of  $n$  photons  
 270 is performed iteratively on the GPU.

271 The advantage of Strategy 1 is the efficient utilization of GPU cores when the number of points and  
 272 elements is small. However, its disadvantage is that it requires a large amount of memory when the  
 273 number of points is large. In contrast, Strategy 2 requires significantly less memory and only transfers  
 274 data to the CPU once, making it highly efficient when the number of points and elements is large.

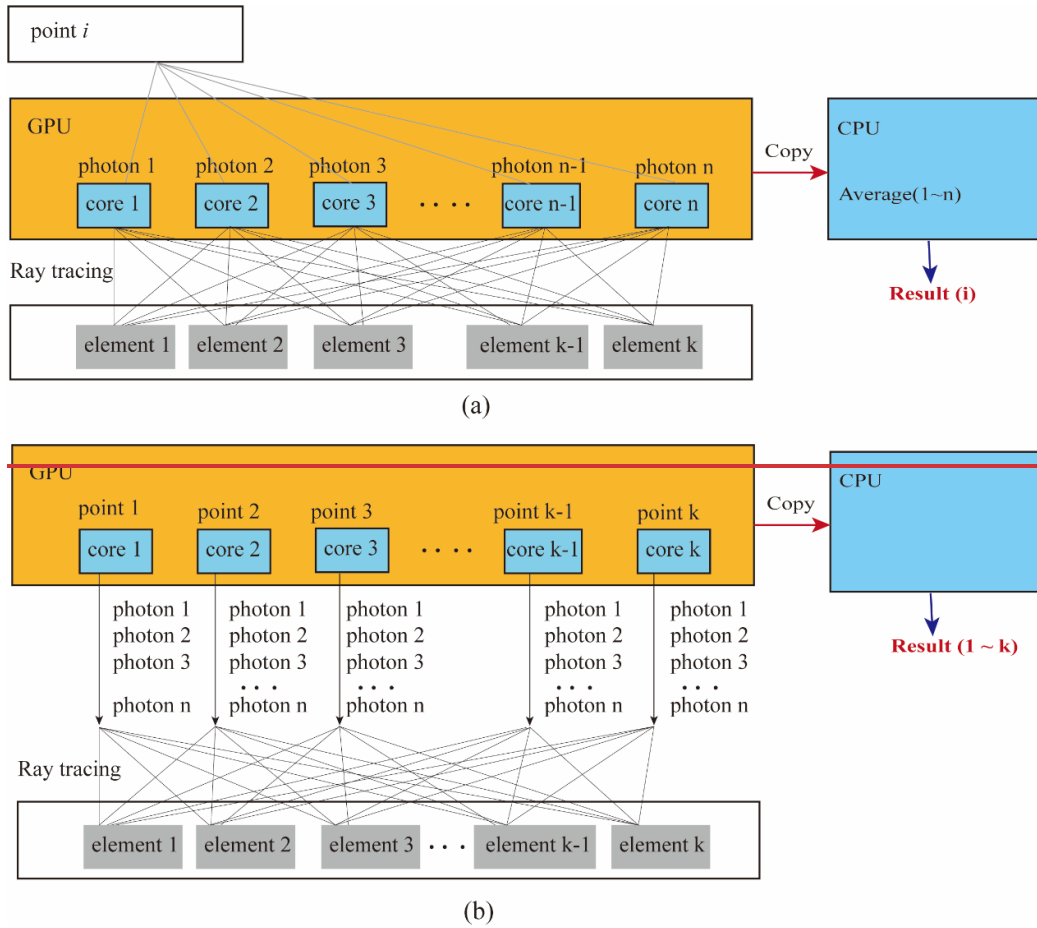

**(a) Strategy 1**

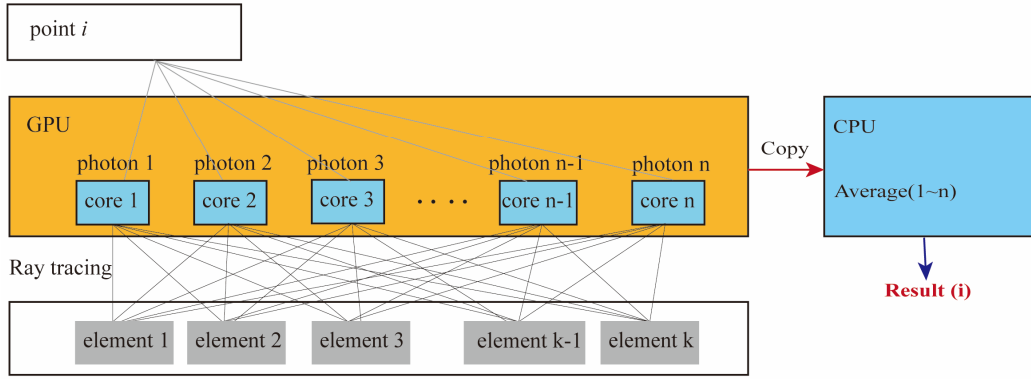

**(b) Strategy 2**

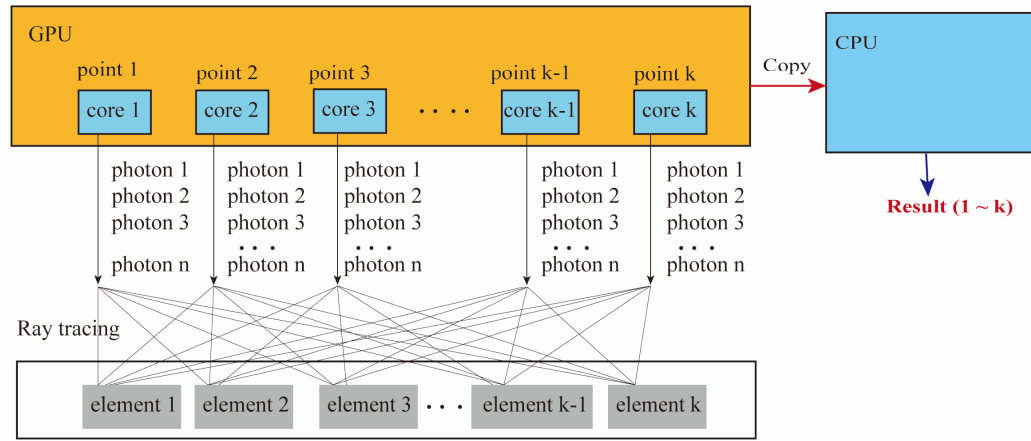

**Figure 4: Two strategies for GPU parallel computing. (a) The ray tracing is conducted point by point. For each point,  $n$  photons are emitted. Each GPU core calculates one photon. (b) The ray tracing is conducted for all points at one time. Each GPU core calculates one point. The ray tracing of  $n$  photons is performed iteratively within the GPU core.**

The space angle of the Sun ( $\Delta\Omega_d$ ) and the number of photons ( $N$ ) can significantly affect the accuracy of reverse MCM. To evaluate this influence, a series of test cases are conducted, in which the directional solar radiation at a ground point is calculated. The solar radiation on the open ground can be calculated theoretically, as there is no shading from buildings.

Figure 5 shows the errors of simulations using different values of  $N$  and  $\Delta\Omega_d$ . The simulation time of each case is also indicated in that figure. When the number of photons is increased from  $N = 10^5$  to  $N = 10^7$ , the simulation time increases from 0.05s to 1.15s, which is an increase of 23 times. The

288 relatively slow increase in simulation time is a result of the parallel computing capabilities of the GPU.

289 In each scenario, the model was run 20 times to observe the difference between each run.

290 A small  $\Delta\Omega_d$  reduce the photon number reaching the Sun, thus increasing the error, where the  $\Delta\Omega_d$  is

291 calculated from a 2D angle  $\theta$  as  $\Delta\Omega_d = 2\pi(1 - \cos(\theta))$ . For example, the error in cases with  $\theta = 3^\circ$

292 greater than that in cases with  $\theta = 6^\circ$ . A larger number of photons is needed to compensate for this error.

293 For example, the case with  $\theta = 3^\circ$  and  $N = 10^7$  shows acceptable accuracy. However, the case with

294  $\theta = 6^\circ$  shows a comparable accuracy when  $N = 10^6$  and takes less simulation time.

295 In the subsequent simulations,  $\theta = 6^\circ$  and  $N = 10^6$  are applied to balance accuracy and simulation

296 time.

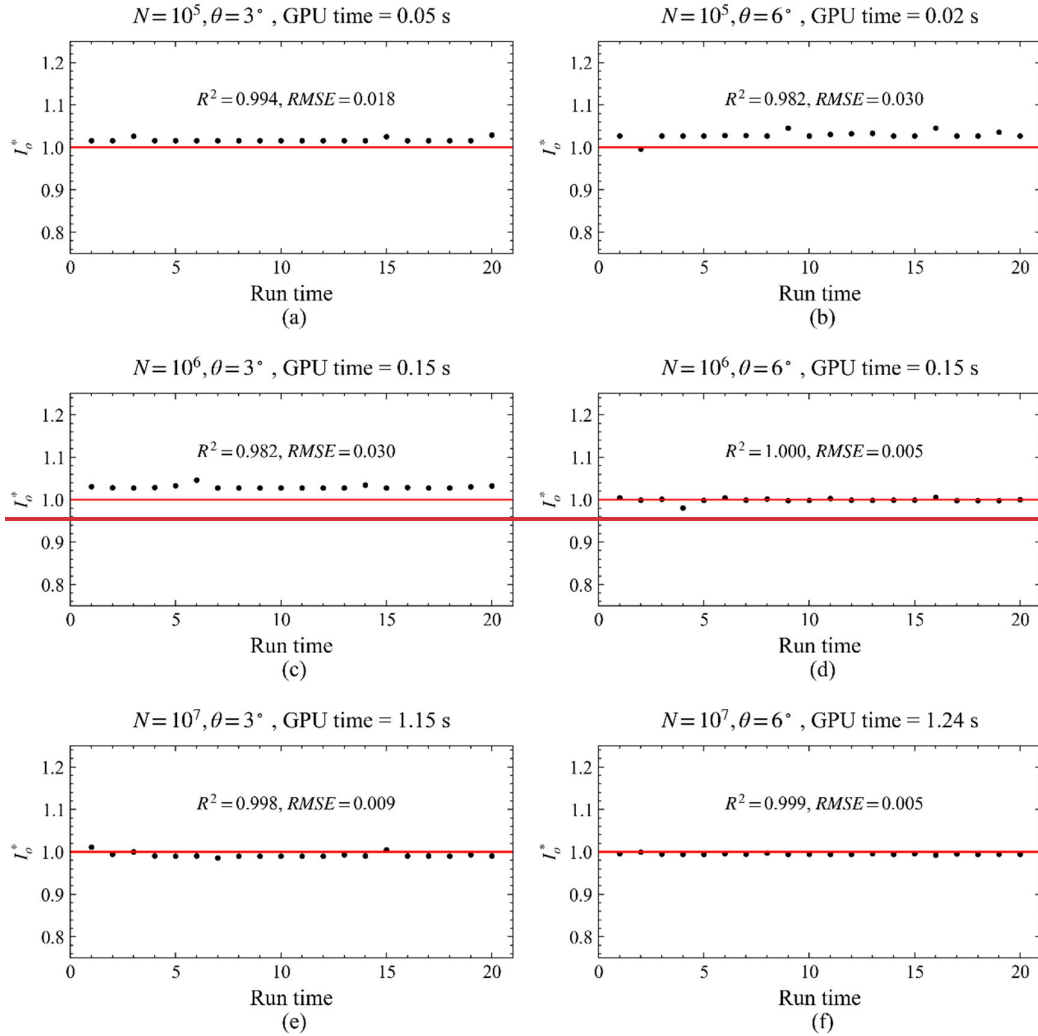

297

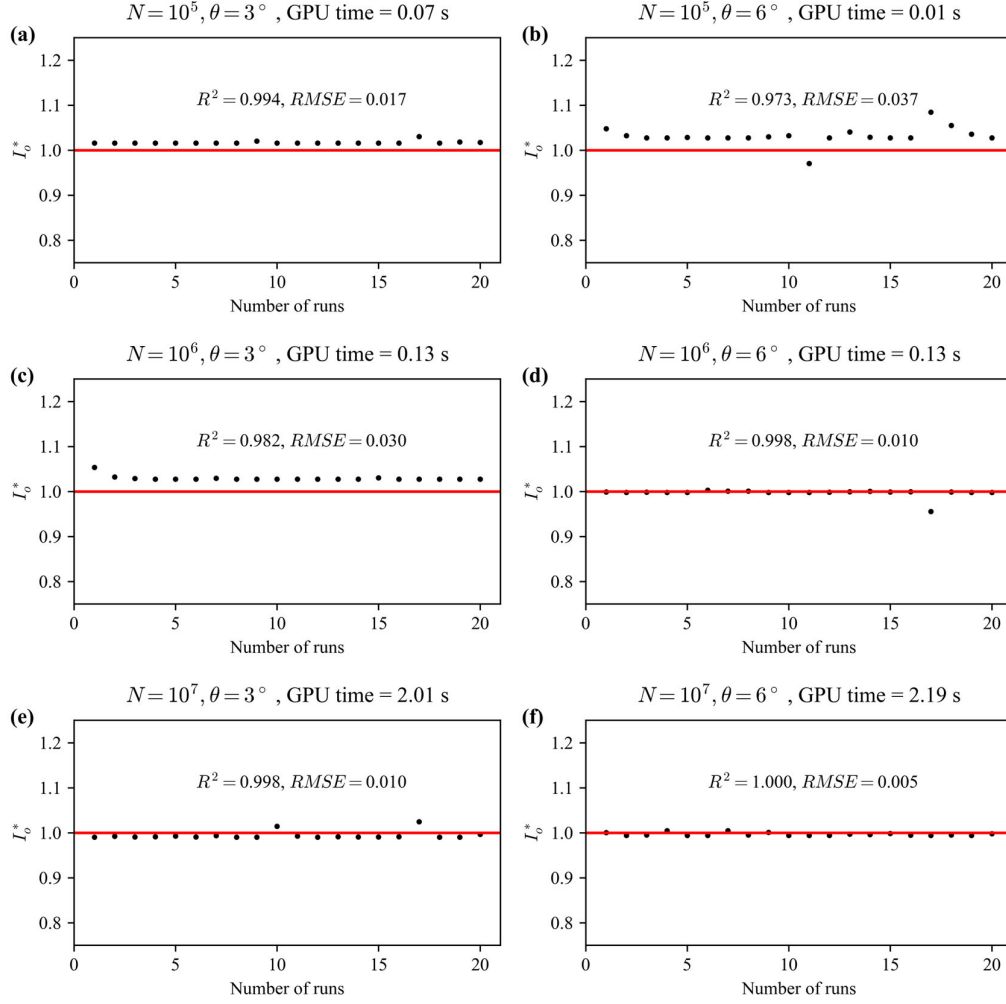

**Figure 5: Numerical errors of directional solar radiation estimation using Monte Carlo method.** The simulated solar radiation ( $I_{o,sim}$ ) is normalized by the true value ( $I_{o,true}$ ) and is expressed by ( $I_o^* = \frac{I_{o,sim}}{I_{o,true}}$ ), where  $I_o^* = 1.0$  represents an exact reproduction of the solar radiation. The test cases use different space angles of sun  $\Delta\Omega_d = 2\pi(1 - \cos(\theta))$  and photon numbers ( $N$ ). The red lines represent the true value, and dots represent the simulated data.

### 2.3. Longwave radiation sub-model

The view factors between the surfaces, as well as from the surfaces to the sky, are also calculated using the Monte Carlo ray tracing model, as illustrated in Fig. 6. The urban surfaces are divided into multiple triangular elements  $N_{ur}$ . The view factor from element  $S_i$  to element  $S_j$ , denoted as  $F_{i,j}$ , is calculated

308 by emitting  $N$  photons from the centroid of element  $S_i$ . The algorithm then counts the number of  
 309 photons  $n_{i,j}$  that reach element  $S_j$ . Finally, the view factor  $F_{i,j}$  is calculated by  $F_{i,j} = n_{i,j}/N$ . The sky  
 310 view factor is also determined in this approach by treating the sky as an urban surface.

311 The longwave radiative heat exchange between the surfaces, as well as from the surfaces to the sky, is  
 312 calculated by:

$$313 \quad q_l = F_{i,sky}\varepsilon(R_{l,in} - \sigma T_i^4) + \varepsilon\sigma \sum_{j=1}^{j=N_{ur}} F_{i,j}(T_j^4 - T_i^4) \quad (12)$$

314 where  $\varepsilon$  is the material emissivity,  $\sigma$  is Stefan–Boltzmann constant ( $= 5.67 \times 10^{-8}$ ) ( $\text{W m}^{-2} \text{K}^{-1}$ ),  $R_{l,in}$  is  
 315 the downward longwave radiation from the sky,  $F_{i,sky}$  is the sky view factor of element  $S_i$ . The surface  
 316 temperature from the previous step ( $T_i$  and  $T_j$ ) is used to calculate the longwave radiative heat exchange.

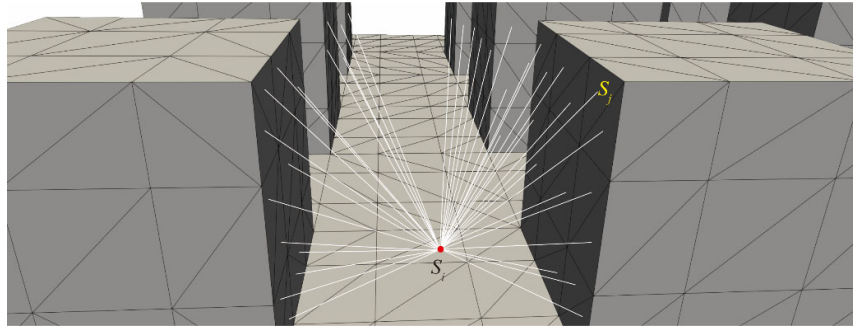

317  
 318 **Figure 6: Schematic illustration of how view factors are calculated between urban surface elements.**

## 319 **2.4. Outdoor convective sub-model**

320 GUST does not calculate urban airflow; instead, it uses empirical formulas to calculate the outdoor  
 321 convective heat flux as follows:

$$322 \quad q_{c,out} = U_f h_{out} (T_{w,out} - T_{a,out}) \quad (13)$$

323 where  $T_{a,out}$  is the outdoor air temperature in the canopy layer,  $U_f$  is the wind speed, and convective  
 324 heat transfer coefficient  $h_{out} = 4.5 \left( \frac{Ws}{\text{m}^3\text{K}} \right)$  is adopted.

325 The wind speed above the urban canopy layer (UCL) is calculated by a logarithm wind profile:



$$U(z) = \frac{u_*}{\kappa} \ln \left( \frac{z + z_0}{z_0} \right) \quad (14)$$

where  $z_0 = 0.1H$  based on the estimation of ([Grimmond and Oke, 1999](#)).

The wind speed within the UCL is assumed to be uniform and is calculated by the model by Benthams and Britter ([Benthams and Britter, 2003](#)). This model estimates the in-canopy velocity ( $U_c$ ) based on the frontal area density ( $\lambda_f$ ) as follows:

$$\frac{U_c}{u_*} = \left( \frac{2}{\lambda_f} \right)^{0.5} \quad (16)$$

Here, the friction velocity ( $u_*$ ) depends on the urban morphology and is estimated using the following functions ([Yuan et al., 2019](#)):

$$\begin{cases} u_* = 0.12U_{2H}, & \text{for } (\lambda_f > 0.4) \\ u_* = 6.7U_{2H}^3 - 6.4U_{2H}^2 + 1.7U_{2H} + 0.03, & \text{for } (\lambda_f < 0.4) \end{cases} \quad (17)$$

where  $U_{2H}$  is the wind speed at a height of  $2H$  above the ground, and  $H$  is the building height.

The air temperature in UCL is assumed to be uniform and calculated by the urban canopy model ([Yuan et al., 2020](#)). This model estimates the in-canopy temperature based on the exchange velocity  $U_E$  and sensible heat flux  $q_{c,out}$ .

$$T_c = \frac{1}{D_c U_{2H} (1 - \lambda_p)} \left( 1 - 0.12 \left( \frac{2}{\lambda_f} \right)^{0.5} \right) + T_{a,2H} \quad (18)$$

where  $D_c = 17.183$ , is a heat capacity constant of the air,  $T_{a,2H}$  is the air temperature above the roof level,  $\lambda_p$  is the plan area density. Benthams and Britter ([Benthams and Britter, 2003](#)) suggested that the  $U_E$  can be calculated by:

$$\frac{U_E}{u_*} = \left( \frac{U_{2H} - U_c}{u_*} \right)^{-1} \quad (19)$$

The  $q_{c,out}$  is calculated by the temperature from previous time step.

## 2.5. Indoor sub-model

The indoor side uses a convective boundary condition given by  $q_{in} = h_{in}(T_{w,in} - T_{a,in})$ , where  $T_{a,in}$  is the indoor air temperature,  $T_{w,in}$  is the wall temperature on indoor side. The indoor heat transfer

348 coefficient  $h_{in} = 13.5 \frac{W}{m^2K}$  accounts for both natural convection and longwave radiative heat flux.

349 For air-conditioned rooms, the indoor air temperature is assumed to be constant at  $T_{a,in} = 26$  °C. In  
350 contrast, for naturally ventilated rooms, the indoor air temperature is assumed to be equal to the in-canopy  
351 air temperature, represented as  $T_{a,in} = T_c$ .

### 352 **3. Model validation and assessment**

#### 353 **3.1. SOMUCH measurement**

354 The model is validated by cross-compare with the SOMUCH measurement, which is a scale outdoor  
355 field measurement conducted in Guangzhou, P.R. China (23°1' N, 113°25' E) ([Hang and Chen, 2022](#);  
356 [Hang et al., 2025](#); [Wu et al., 2024](#)). This measurement provides a quality database for evaluating urban  
357 climate models ([Hang et al., 2024](#); [Chen et al., 2025](#)). The campaign conducted from 29th Jan to 1st  
358 Feb 2021 is used. In that campaign, both surface and air temperatures were measured at high resolution,  
359 making it an ideal database for validating current models.

360 The geometry of the building blocks and measurement points are plotted in Fig. 7. In that measurement,  
361 the urban buildings are modeled by hollow concrete blocks with a size of 0.5 m× 0.5 m× 1.2 m and a  
362 thick of 0.015 m. The blocks are arranged to form street canyons with four different aspect ratios, i.e.,  
363  $H/W = 1, 2, 3, 6$ . Each row consists of 24 blocks and has a length of  $L = 12$  m. In the experiment, the  
364 surface and air temperatures are measured using thermocouples (Omega, TT-K-36-SLE,  $\Phi 0.127$  mm and  
365 TT-K- 30-SLE,  $\Phi 0.255$  mm). The wind speeds inside and above the street canyon are measured using  
366 sonic anemometers (Gill WindMaster). The incoming longwave and ~~shortwave~~solar radiation are  
367 measured using weather stations (RainWise PortLog). The thermal characteristics of the concrete and  
368 ground are listed in Table 1.

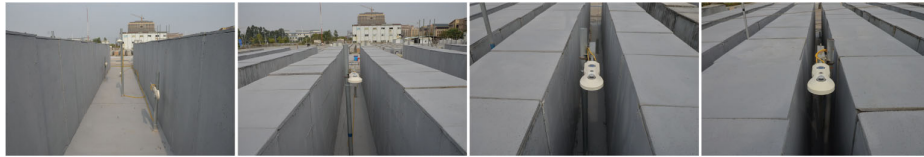

(a)

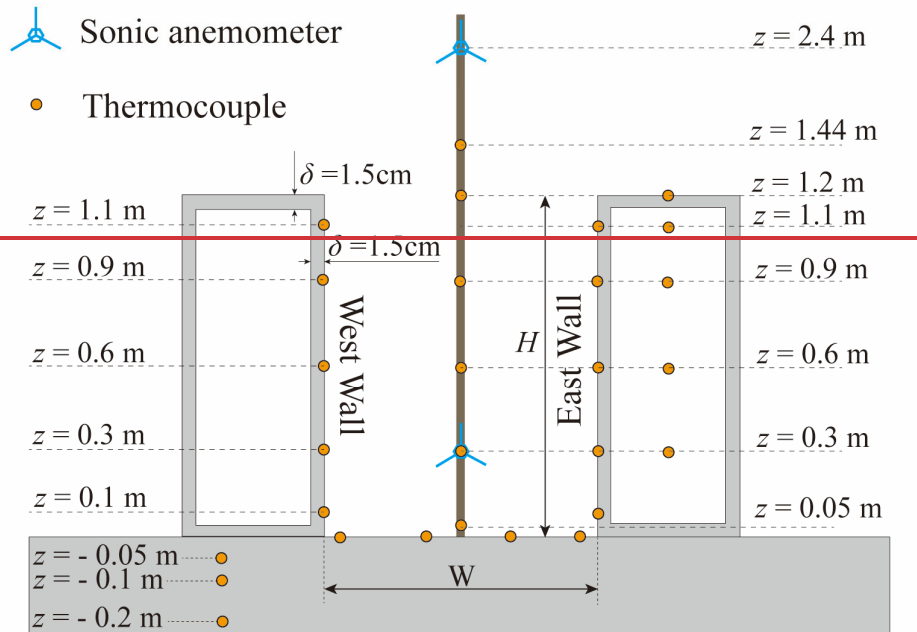

(b)

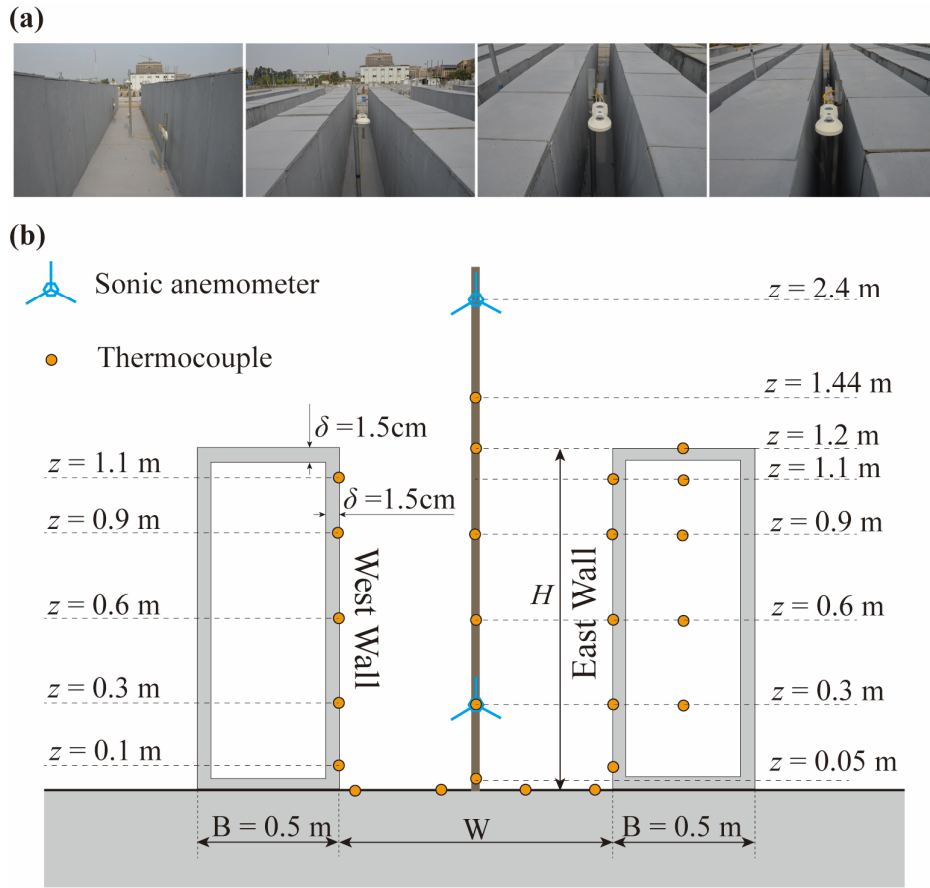

**Figure 7: Photograph of the SOMUCH experiment (a). The geometry of concrete blocks and measurement points in SOMUCH (b). The thermocouples are used to measure the surface temperature and air temperature. The sonic anemometers are used to measure wind speed.**

375 **Table 2. Thermal properties of the building material. The emissivity is for the longwave radiation and albedo**  
376 **is for the shortwavesolar radiation.**

| Material | Density $\rho$<br>(kg m <sup>-3</sup> ) | Conductivity $k$<br>(W m <sup>-1</sup> K <sup>-1</sup> ) | Specific Heat Capacity $c_p$<br>(J kg <sup>-1</sup> K <sup>-1</sup> ) | Emissivity<br>$\epsilon$ | Albedo<br>$\alpha$ |
|----------|-----------------------------------------|----------------------------------------------------------|-----------------------------------------------------------------------|--------------------------|--------------------|
| Concrete | 2420                                    | 2.073                                                    | 618                                                                   | 0.87                     | 0.24               |

377

### 378 **3.2. Cross comparison of the roof temperature**

379 The surface temperature model is validated by cross-comparing with SOMUCH measurement. Many  
380 factors affect the accuracy of the model, including the radiation, convective and conduction. To  
381 separately investigate these factors, the temperatures at roofs are first validated because the total radiative  
382 flux of roof is only influenced by the incoming longwave and shortwavesolar radiation. The shading  
383 effect of other blocks can be ignored as the block heights are uniform. Therefore, the accuracy of  
384 conductive and convective sub-models can be separately evaluated.

385 The accuracy of this model is quantitatively evaluated by two statistical parameters, the root mean square  
386 error (RMSE), and coefficient of determination ( $R^2$ ). The RMSE and  $R^2$  of  $u_x^*$  are calculated by:

$$387 \quad \text{RMSE} = \sqrt{\frac{1}{n} \sum_{i=1}^n (O_i - P_i)^2} \quad (21)$$

$$388 \quad R^2 = 1 - \frac{\sum_{i=1}^n (O_i - P_i)^2}{\sum_{i=1}^n (O_i - \overline{O_i})^2} \quad (22)$$

389 where  $O_i$  represents the measured values,  $P_i$  is the simulated values,  $\overline{O_i}$  is the mean of the measured  
390 values, and  $n$  is the number of data points.

391 The wind speed at roof level is needed to calculate the outdoor convective flux of roofs. In SOMUCH  
392 measurement, the wind speed was measured above the roof and at a height of  $2H$ . The wind speed at  
393 roof level is estimated by a logarithm wind profile as:

$$U(z) = \frac{u_*}{\kappa} \ln \left( \frac{z + z_0}{z_0} \right) \quad (23)$$

where  $z_0 = 0.1H$  based on the estimation of (Grimmond and Oke, 1999). The wind velocity at roof level ( $z = H$ ) can be calculated by  $\frac{u_H}{u_{2H}} = 0.787$ . The outdoor air temperature, incoming shortwavesolar and longwave radiation, are from the weather station ( $z = 2H$ ).

For the indoor side, the radiative flux between indoor surfaces is ignored in this model. Only the convective flux is modeled. The convective velocity is assumed to be 3 m/s and CHTC is assumed to be 4.5 for indoor side. Data from the indoor measurement point at  $H = 1.1$  m is used. That point is the nearest measurement point to the roof.

Figure 8(a) plotted the measurement data that was used to drive the model. During the measurements, the building model was enclosed, leading to the development of very high indoor temperatures. Therefore, the measured indoor air temperature was used as an input for the validation simulation. Fig. 8(b) shows the roof surface temperatures from measurement and simulation. Generally, the roof surface temperatures are well reproduced by the model, because the  $R^2$  is 0.99 and  $RMSE$  is 1.28. The large discrepancy is found around noon. The model slightly overestimates the roof temperature. The comparison of roof temperatures shows that the conductive and convective sub-models are reliable.

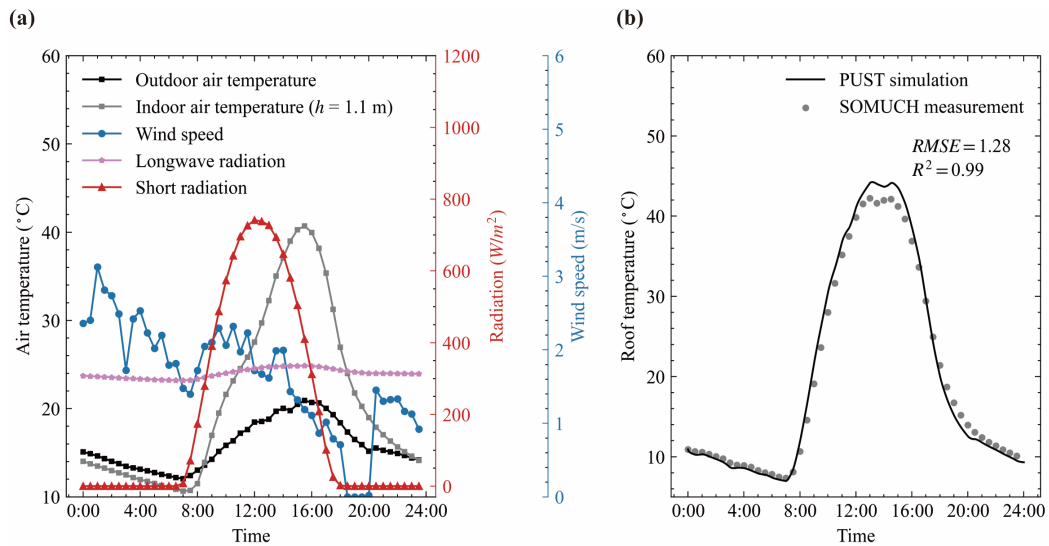

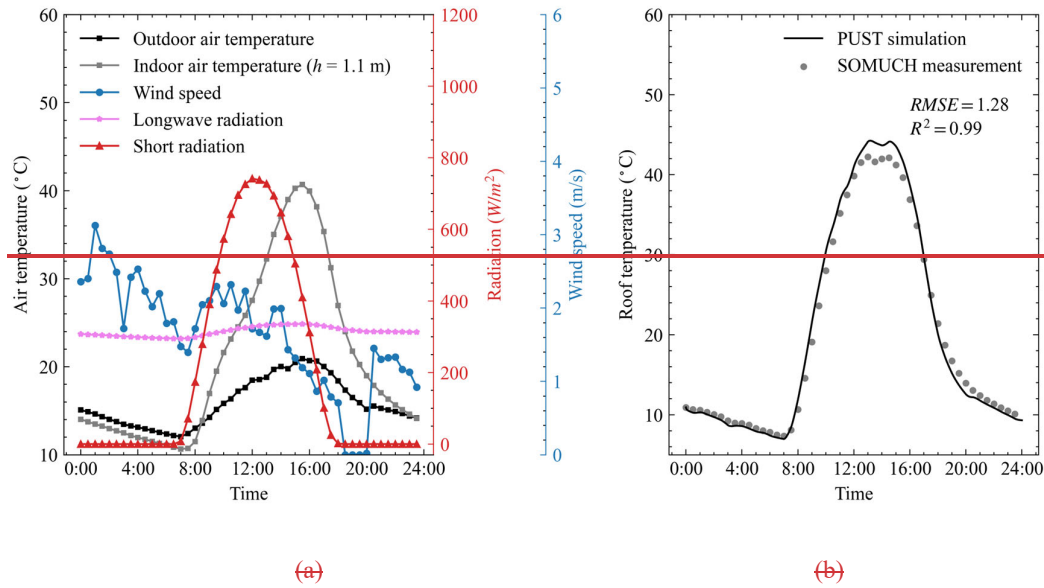

**Figure 8: Weather data on the measurement date (29 January 2021) is shown in (a). Panel (b) compares roof surface temperatures from simulation and measurement, where points denote measured data and lines denote simulated data. The weather data on the measurement date (measured on 29<sup>th</sup> Jan 2021) is plotted in (a). Comparison of the roof surface temperatures from simulation and measurement (b). The points represent measured data and lines represent the simulated data.**

### 3.3. Cross comparison of the wall temperature

The temperatures at walls are more complicated than those at the roof because the buildings change the radiative fluxes and wind speeds in street canyons. The radiative fluxes need to be accurately modelled as they are the main energy input and have a large impact on the surface temperature. To avoid the influence of air temperature and wind speed modeling, the canyon air temperature, wind speed, and indoor temperature are from the measurement. The air temperatures are measured from multiple heights. For the convective flux modelling, the nearest measured air temperatures are used. The wind speeds from the sonic anemometer in the street canyon ( $z = 0.3$  m) are used to calculate the convective flux at outdoor side. The driving data are plotted in Appendix A.

The east and west walls are defined by taking street canyon center as the origin point. The street direction is tilted from north toward east by  $25^\circ$ . Therefore, the west and east walls are roughly defined to distinguish them. The street orientation has been modeled in our model and will not cause additional

428 discrepancy.

429 Figures 9 and 10 show the comparison of wall temperatures from simulation and measurement. For each  
430 surface, multiple points are compared to avoid the influence of localized anomalies and to ensure that  
431 the evaluation reflects the overall wall-temperature behavior. The  $R^2$  and RMSE are calculated and  
432 marked in each sub-figure. Generally, the wall temperatures are well reproduced, particularly their  
433 variation trend. The peak hours are well reproduced. For example, there are two temperature peaks for  
434 the west wall. The first one is around 10:00 and the second is around 16:00. Both simulation and  
435 measurement show the same occurring time.

436 To quantify model performance, the coefficient of determination ( $R^2$ ) and root-mean-square error  
437 (RMSE) were calculated and marked in each sub-figure. Except for the  $H/W = 6$  case, the  $R^2$  values  
438 exceeded 0.9 for all walls, confirming a strong correlation between simulation and measurement. For  
439  $H/W = 6$ ,  $R^2$  is lower because of nighttime underestimation, although the RMSE remains within the  
440 same range as the other cases (1.6 °C to 2.2 °C). The main reason for this discrepancy is that wall  
441 temperatures in deep street canyons ( $H/W = 6$ ) show only a slight increase compared to the air  
442 temperature, due to minimal sunlight penetration into the canyon. Under these conditions, wall  
443 temperatures become particularly sensitive to convective and longwave radiative fluxes, which amplifies  
444 the impact of small modeling uncertainties. In these cases, wall temperatures can be highly sensitive to  
445 convective and longwave radiative fluxes.

446 ~~The accuracy of wall temperature modeling varies from point to point. There are two main observations~~  
447 ~~from the comparison of wall temperatures.~~

448 ~~a) Accuracy Difference Between Walls: The temperatures on the east wall are modeled more accurately~~  
449 ~~than those on the west wall, as the model tends to underestimate the peak temperatures on the west wall.~~  
450 ~~For  $H/W = 1$ , the  $R^2$  values for west wall temperatures range from 0.95 to 0.98, while those for east wall~~  
451 ~~temperatures range from 0.91 to 0.95. For  $H/W = 2$ , the  $R^2$  values for the west and east wall temperatures~~  
452 ~~show only a slight difference. However, the RMSE values for the west wall, which range from 0.69°C to~~  
453 ~~1.85°C, are evidently lower than those for the east wall, which range from 0.82°C to 2.53°C. The  $R^2$  and~~  
454 ~~RMSE values for  $H/W = 3$  are comparable to those for  $H/W = 2$ .~~



b) Accuracy Difference Between Points: The underestimation of west wall temperature particularly pronounced at higher levels ( $z=90$  cm and  $110$  cm). At lower levels ( $z=10$  cm and  $30$  cm), temperatures are underestimated at night. The largest discrepancies occur at these lower levels in  $H/W=6$ , with a minimum  $R^2$  of  $0.51$  and a maximum RMSE of  $1.98^\circ\text{C}$ . The  $R^2$  values suggest that wall temperatures at these levels are estimated poorly; however, the RMSE values do not appear abnormally high, reaching  $2.53^\circ\text{C}$  at  $z=90$  cm in  $H/W=2$ . The main reason for this discrepancy is that wall temperatures in deep street canyons ( $H/W=6$ ) show only a slight increase compared to the air temperature, due to minimal sunlight penetration into the canyon. In these cases, wall temperatures can be highly sensitive to convective and longwave radiative fluxes.

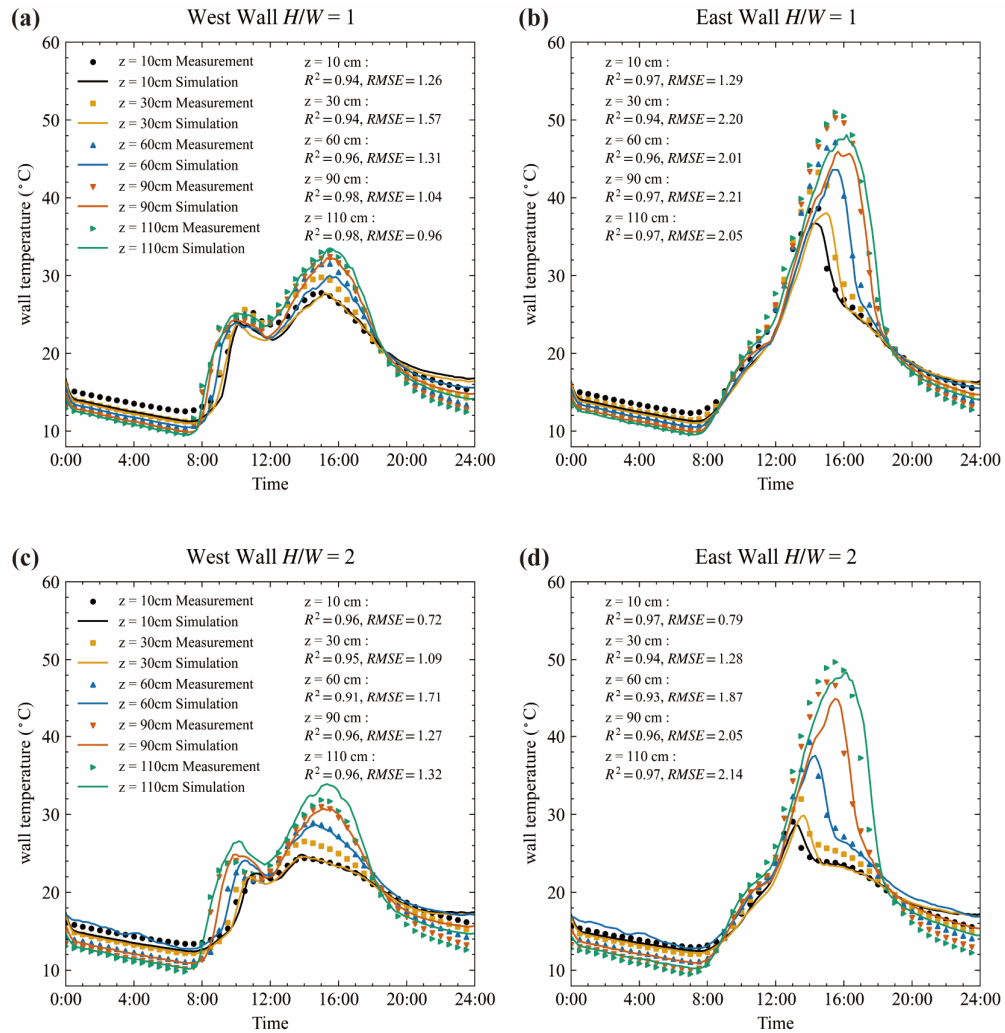

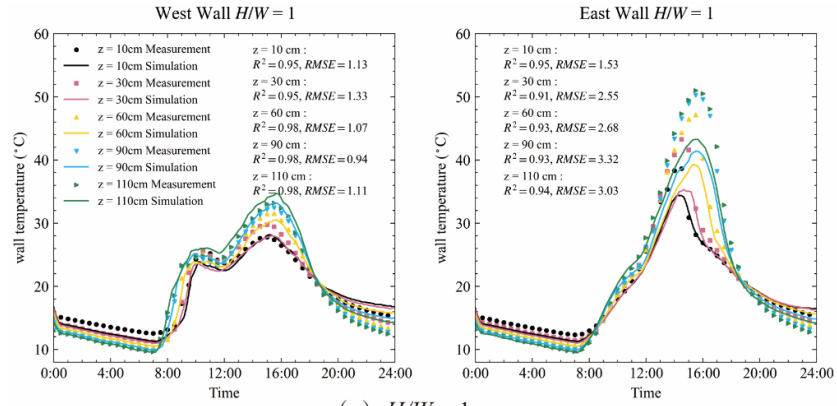

(a)  $H/W = 1$

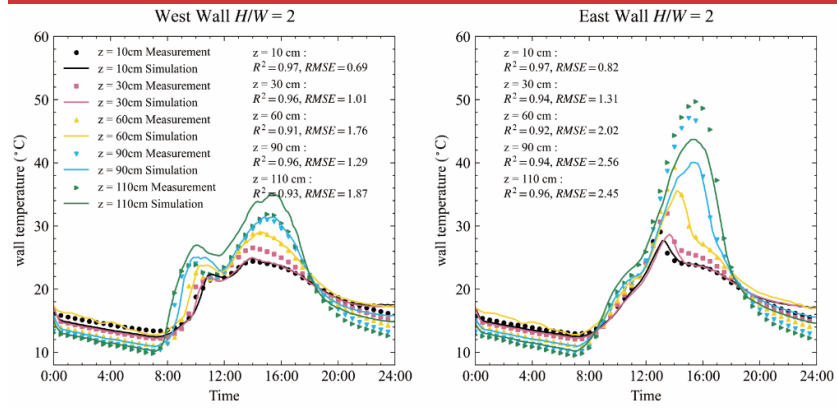

(b)  $H/W = 2$

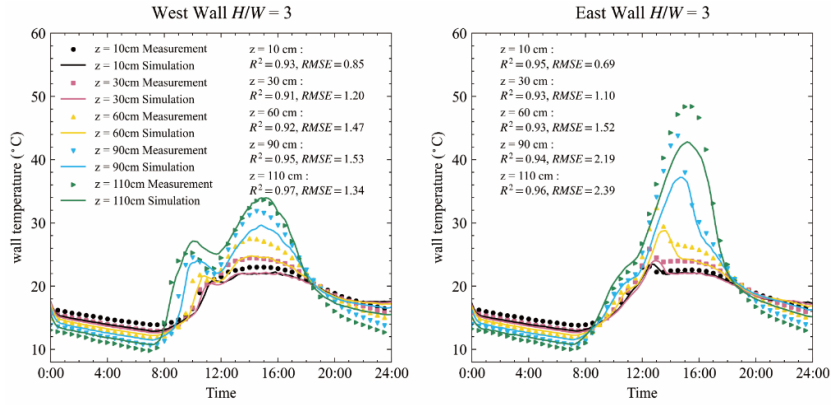

(c)  $H/W = 3$

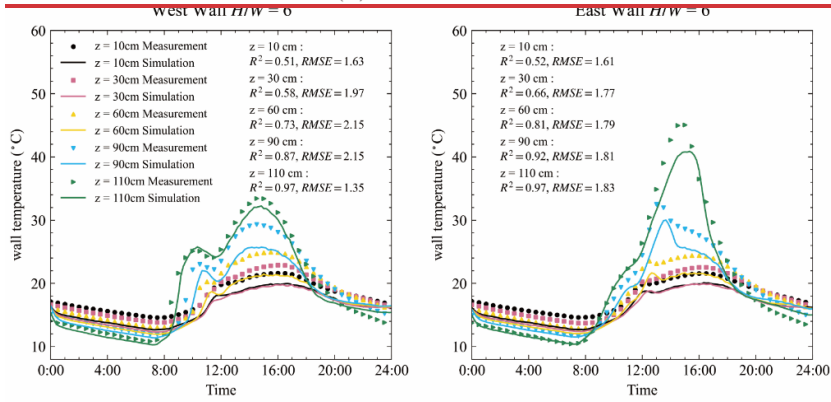

(d)  $H/W = 6$

**Figure 9: Wall temperature comparison between simulation and measurements for street canyons with aspect ratios of  $H/W = 1.0$  and  $2.0$ . Surface temperatures were measured on 29 January 2021. The root mean square error (RMSE) and coefficient of determination ( $R^2$ ) are calculated and shown. Symbols denote measurements, while lines indicate simulations. The left panel corresponds to west side walls and the right panel to east side walls. —Wall temperature comparison between the simulation and measurement results at street canyon aspect ratio of  $H/W = 1.0, 2.0, 3.0$ , and  $6.0$ . Surface temperatures are measured on 29<sup>th</sup> Jan 2021. The root mean square error (RMSE), and coefficient of determination ( $R^2$ ) are calculate and plotted. The points represent measured data and lines represent the simulated data.**

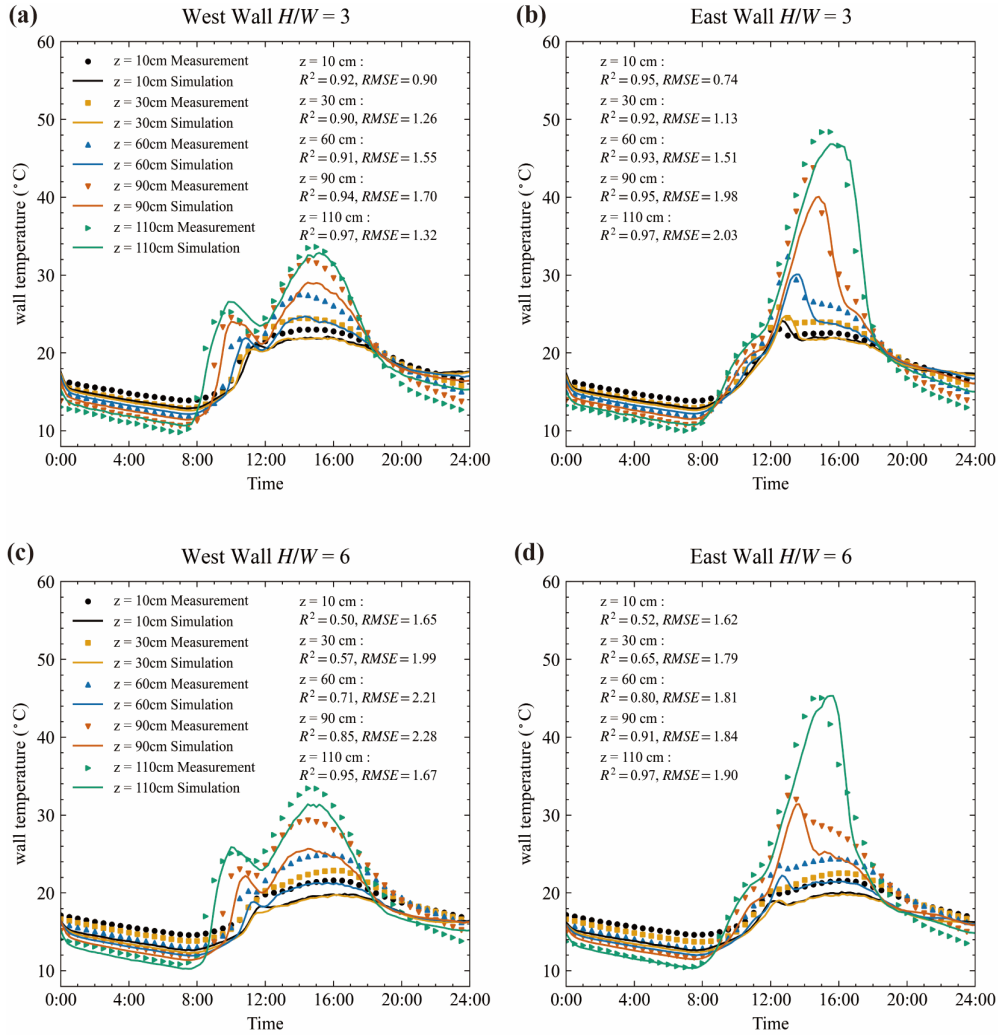

**Figure 10: Wall temperature comparison between simulations and measurements, as in Figure 9, but for street canyons with aspect ratios of  $H/W = 3$  and  $6$ .**

### 3.4. Cross comparison of the ground temperature

The surface temperatures of the ground are heavily influenced by heat storage. During the day, heat is conducted to deeper layers and stored there. At night, this stored heat is released. Therefore, the initial temperature field and boundary conditions are critical for accurately modeling surface temperatures. In this study, an adiabatic boundary condition is applied at a depth of 0.5 m below the ground surface. The soil material is divided into three layers with thicknesses of 0.2 m, 0.15 m, and 0.15 m. All three layers are assumed to be made of concrete. The thermal properties in Table 1 are used. The underground

temperatures are measured by thermocouples with three depths of 5 cm, 10 cm, and 20 cm, as plotted in Appendix A. In this study, we used only the measured underground temperatures at 0:00 to initialize the underground temperature field. It is important to note that the available soil temperatures were measured in open ground rather than under street canyons. This difference may lead to discrepancies in modeling ground surface temperatures.

Figure ~~10-11~~ shows the ground surface temperatures from measurement and simulation. The ground surface temperatures are measured at four locations: g1, which is close to west wall; g4, which is close to east wall; and g2 and g3, which are situated in the middle of the streets. Generally, the temperature variations are well reproduced by the model. For example, peak temperatures occur sequentially from g1 to g4 due to the movement of the building's shadow. This phenomenon is observed in both simulations and measurements.

The accuracy of ground temperatures is lower than that of the wall temperatures in terms of  $R^2$ . For example, in  $H/W = 2$ , the  $R^2$  values for temperatures at the west wall range from 0.91 to 0.97, while those at the ground range from ~~0.64-67~~ to ~~0.9089~~. However, the ground temperatures can be considered ~~better-well~~ modeled because the RMSE for ground temperatures is smaller than that for wall temperatures. Using  $H/W = 2$  as an example, the RMSE values for the west wall range from 0.69 to ~~1.85-71~~ °C, while those for the ground range from ~~1.050.98~~ to ~~1.3724~~ °C. This difference between the  $R^2$  and RMSE values is due to the ground temperature increase being much lower than that of the walls because of shading, particularly in deep street canyons.

Uncertainties in the input data may also contribute to the discrepancies between simulation and measurement. First, the thermal properties of soil can differ significantly from those of concrete blocks. Secondly, the initial temperature is measured in surrounding area, rather than in street canyons. Thirdly, since the same initial temperature field is used for all four points, the model is unable to reproduce the differences between points at night.

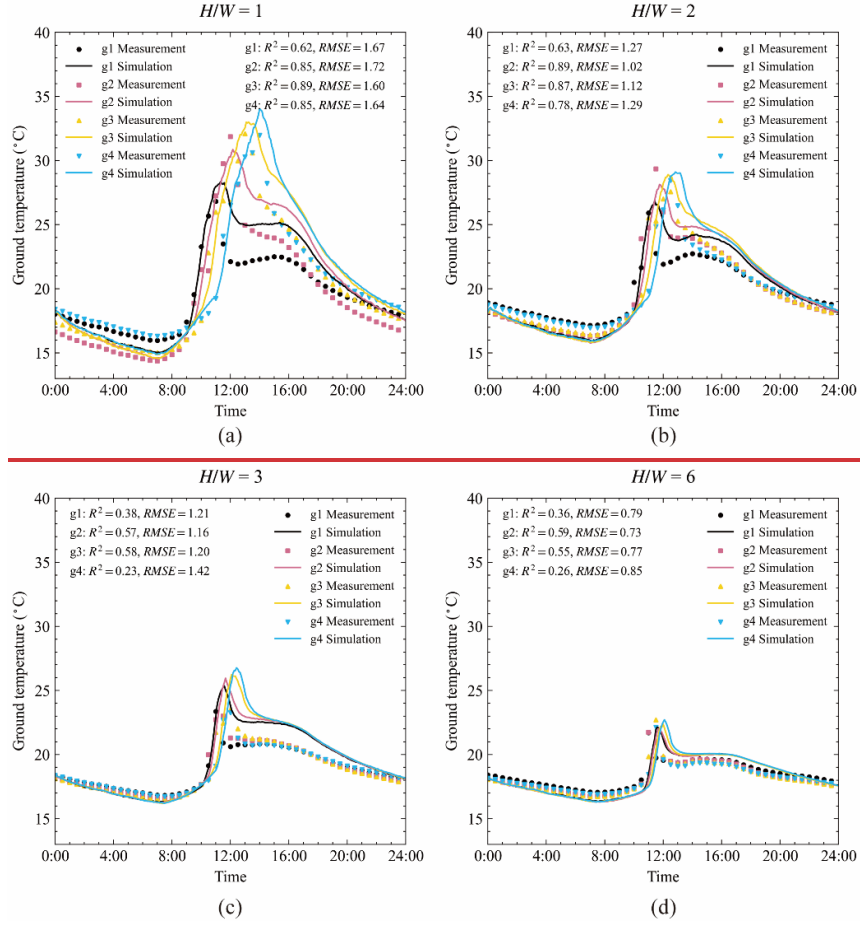

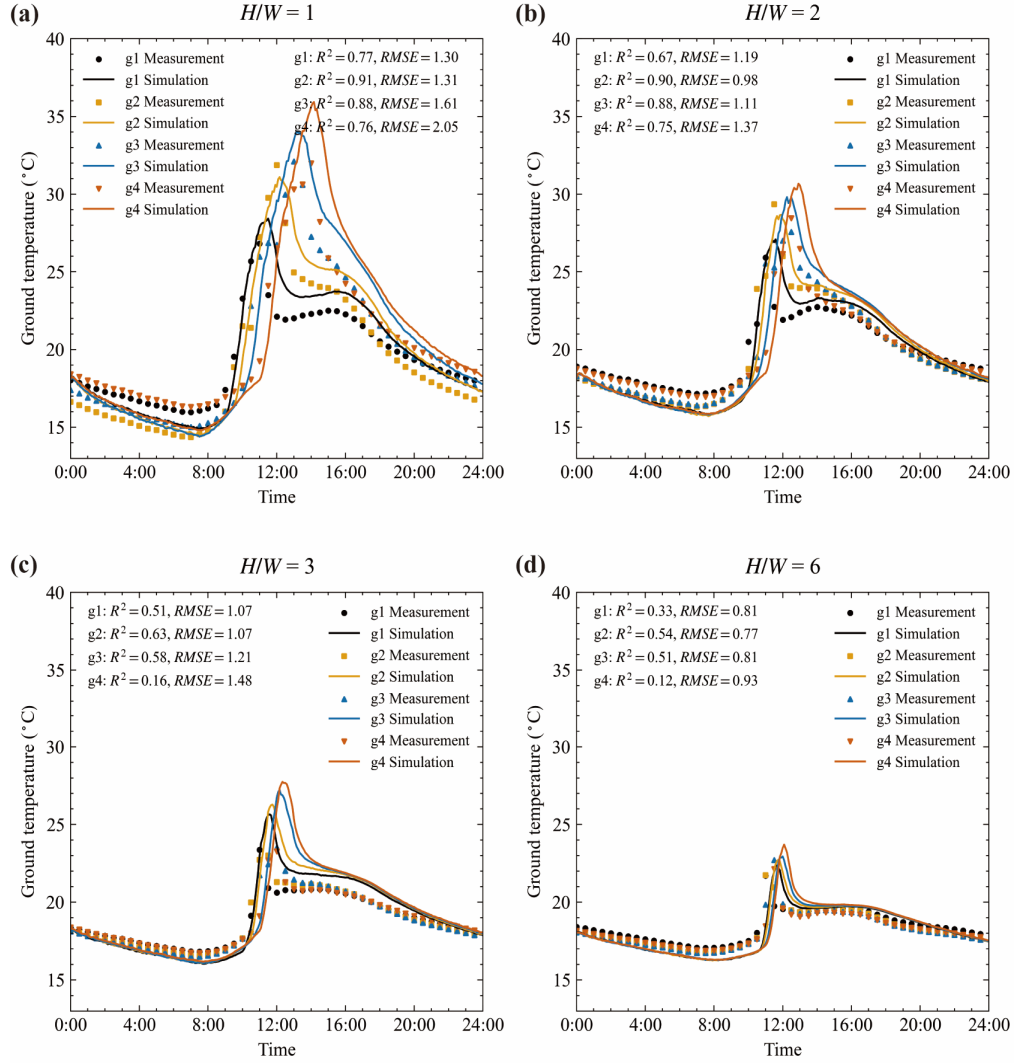

**Figure 40:** Ground temperature comparison between the simulation and measurement results at street canyon aspect ratio of  $H/W = 1.0, 2.0, 3.0$ , and  $6.0$ . Surface temperatures are measured on 29<sup>th</sup> Jan 2021. The root mean square error (RMSE), and coefficient of determination ( $R^2$ ) are ~~calculated~~calculated and plotted. The points represent measured data and lines represent the simulated data.

### 3.5. Surface energy balance analysis

The surface temperature comparison indicates that model uncertainties arise from various factors. To identify the main factors impacting the model accuracy, the energy balance of wall surface is analyzed.

520 The heat fluxes of ~~shortwavesolar~~ ( $Q_K$ ), longwave radiation ( $Q_L$ ), convection ( $Q_H$ ), and conduction ( $Q_G$ )  
521 of outer surface of walls satisfy the following equation:

$$522 \quad Q_K + Q_L + Q_G + Q_H = 0 \quad (24)$$

523 Here, the longwave heat flux  $Q_L$  is divided into two parts as the heat exchange between wall to sky  
524 ( $Q_{L,sky}$ ) and to other urban surfaces ( $Q_{L,urban}$ ), expressed as  $Q_L = Q_{L,sky} + Q_{L,urban}$ . This analysis aims  
525 to determine whether it is necessary to model the longwave heat exchange between urban surfaces, which  
526 requires substantial computational resources.

527 Figures ~~4-12 and 13~~ shows the heat fluxes of walls in the simulation. The heat fluxes of east and west  
528 walls are averaged from five measurement points on each. ~~Our previous study has demonstrated that the~~  
529 ~~Monte Carlo ray tracing method has good accuracy in predicting solar radiation(Mei et al., 2025). Our~~  
530 ~~previous work (Mei et al., 2025) demonstrated that a Monte Carlo ray-tracing approach accurately~~  
531 ~~predicts incident solar radiation. In that study, we compared the albedo of the urban canopy layer and of~~  
532 ~~street canyons across a range of urban layouts with in-situ measurements, achieving excellent agreement.~~

533 In all cases, longwave radiative heat exchange between urban surfaces plays an important role in the  
534 energy balance, particularly at high aspect ratios. The longwave radiative fluxes from sky only contribute  
535 a small amount of total longwave radiative flux in  $H/W = 6$ , as shown in Fig. ~~4012~~(d) and Fig. 13(d). The  
536 shading effect of buildings creates heterogeneous surface temperatures within the urban canopy layer.  
537 The large temperature differences between surface elements contribute a large portion of the total heat  
538 flux. This highlights the necessity for accurate modeling of longwave heat exchange between urban  
539 surfaces, even though it demands significant computational resources.

540 The conductive heat flux also contributes a large portion of the total heat flux. It is negative in the  
541 morning and positive in the afternoon, meaning that heat is stored in the building block during the  
542 morning and released in the afternoon. In the reduced scale experiment, buildings were represented by  
543 airtight hollow concrete blocks. Due to the lack of ventilation, the indoor air temperature can rise to 40°  
544 C under an outdoor air temperature of 20°C, as shown in Appendix A. This indicates that the indoor air  
545 can also absorb, store, and release a considerable amount of heat. Therefore, accurately modeling indoor  
546 air temperature is essential for effective surface temperature modeling.



547 The convective contributes a smaller amount of the total heat flux. In high aspect ratio cases ( $H/W = 3$   
548 and 6), the convective heat fluxes are almost negligible. This is due to the weak wind in the deep street  
549 canyons. In this model, the surface convective heat flux is directly calculated from the wind speeds in  
550 street canyons. This assumption may underestimate the convective flux, especially since natural  
551 convection occurs under weak wind conditions (Fan et al., 2021).

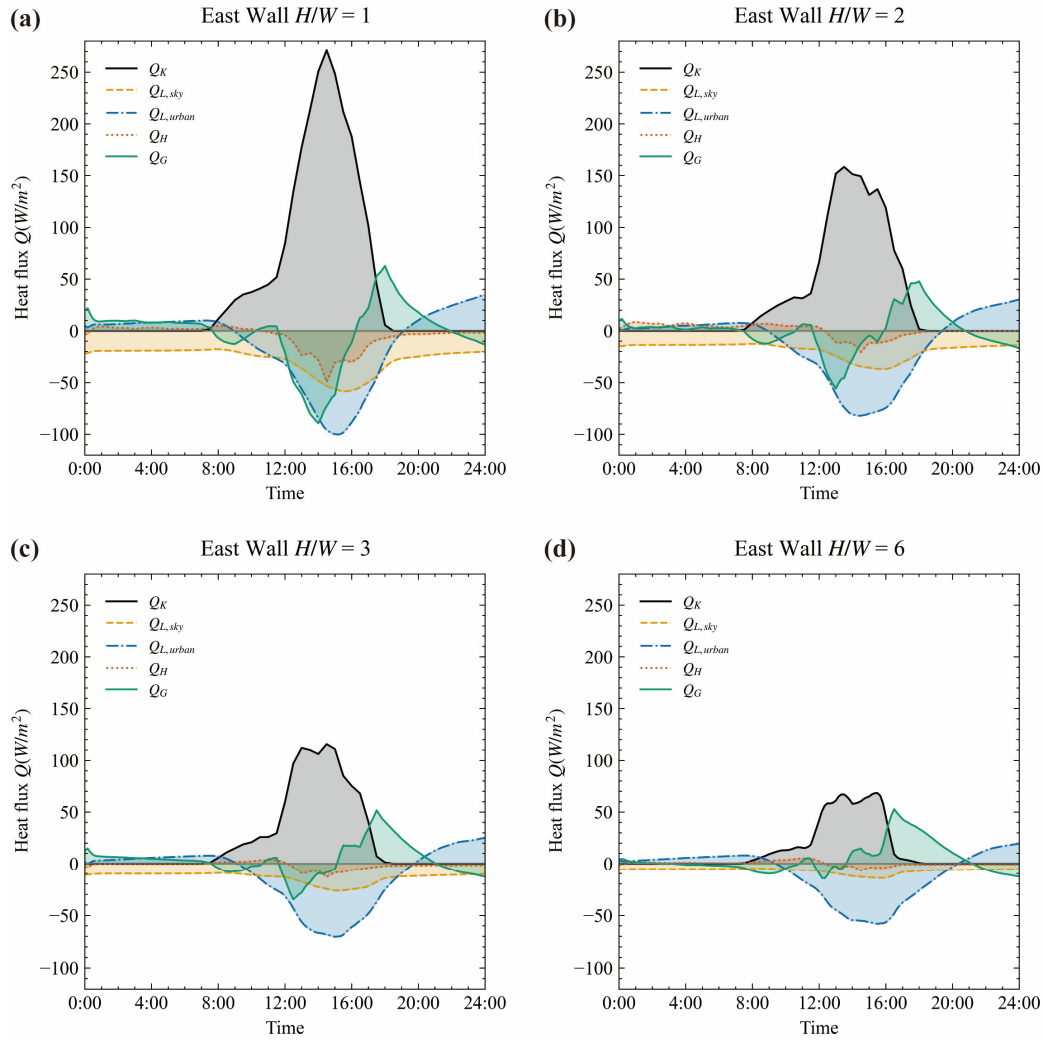

552  
553 **Figure 12: Diurnal heat fluxes at the east side walls from the simulation. The heat fluxes of solar ( $Q_K$ ),**  
554 **longwave radiation ( $Q_L$ ), convection ( $Q_H$ ), and conduction ( $Q_G$ ) are at the outer surface of walls.**

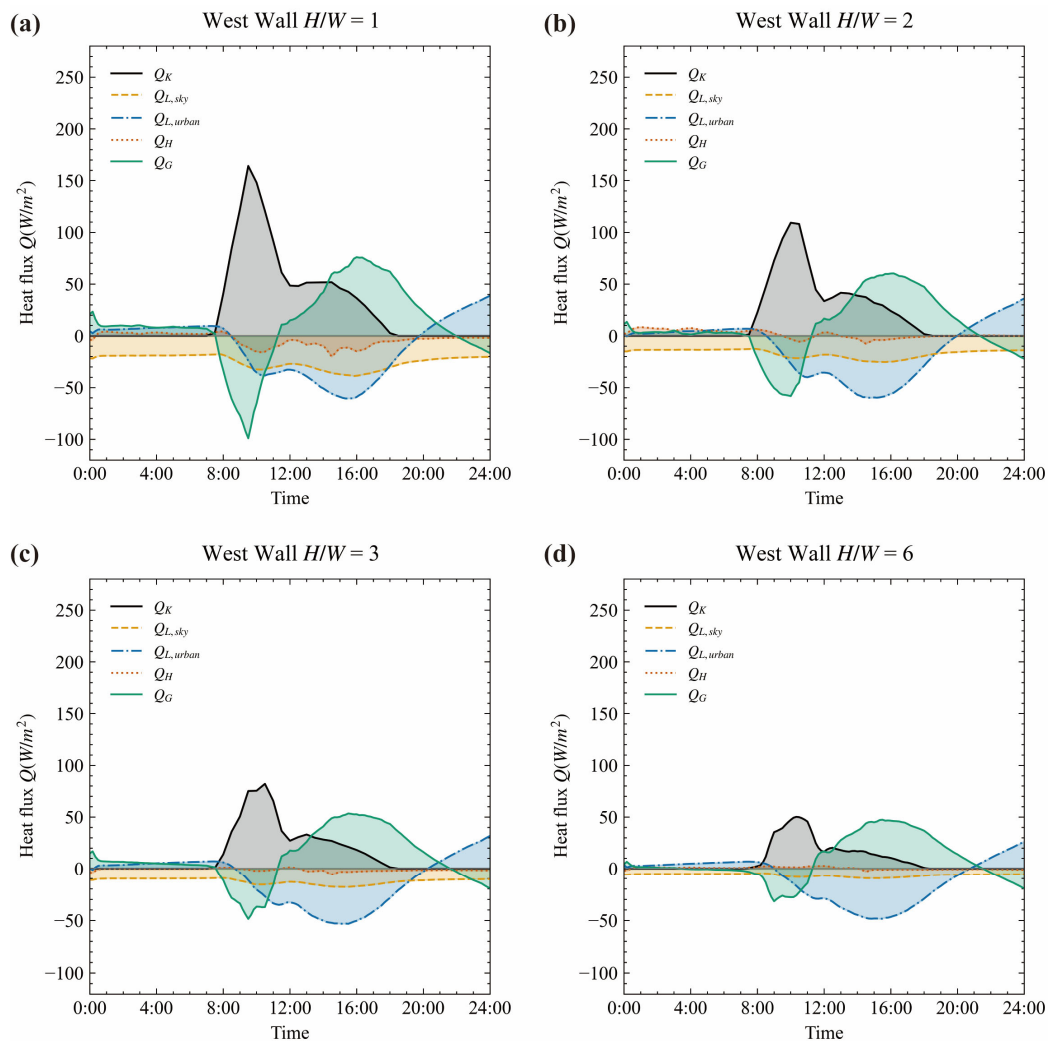

555

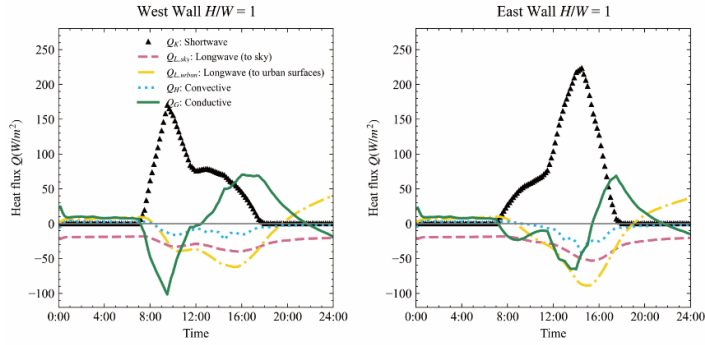

(a)  $H/W = 1$

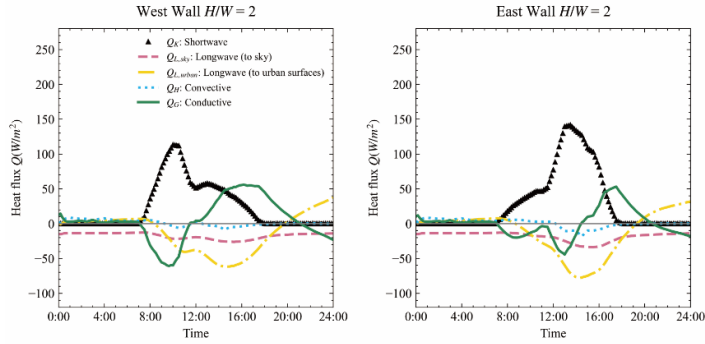

(b)  $H/W = 2$

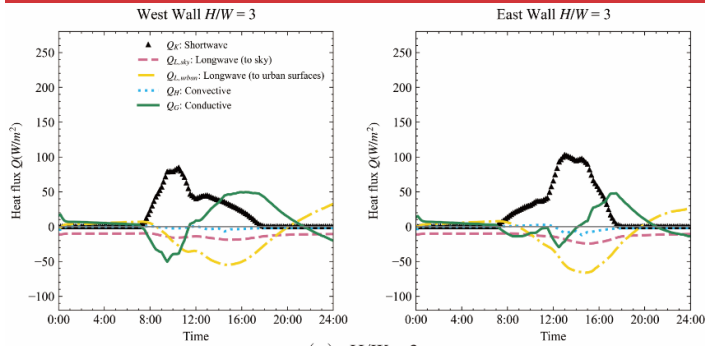

(c)  $H/W = 3$

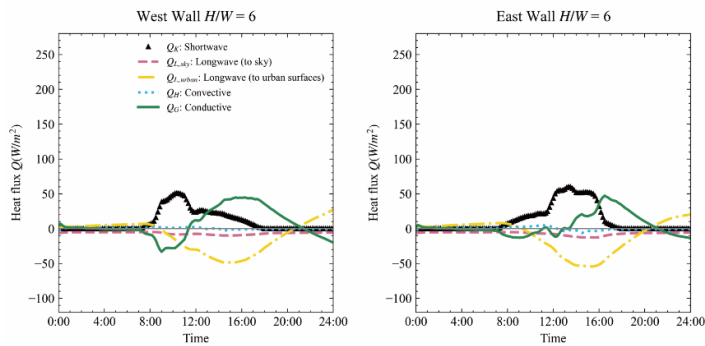

(d)  $H/W = 6$

556

557

**Figure 13: Diurnal heat fluxes at the west side walls from the simulation. The heat fluxes of solar ( $Q_K$ ),**

558

**longwave radiation ( $Q_L$ ), convection ( $Q_H$ ), and conduction ( $Q_C$ ) are at the outer surface of walls.**

Figure 11: Diurnal heat fluxes from the simulation. The heat fluxes of shortwave ( $Q_K$ ), longwave radiation ( $Q_L$ ), convection ( $Q_H$ ), and conduction ( $Q_G$ ) are at the outer surface of walls.

#### 4. Application to real urban configuration

To show how this model can be implemented in complex geometries, a neighborhood with 40 buildings is modeled. The building geometries are constructed by .*stl* files with  $2.3 \times 10^4$  triangular surface meshes. The surface temperatures are calculated on the grids. As a demonstration case, the complex albedo of urban surfaces is ignored. A uniform albedo of 0.24 is used for all urban surfaces. To demonstrate the model's applicability to complex geometries, we simulated a neighborhood containing 40 buildings within an area of 350 m  $\times$  200 m. Building geometries were imported as STL files comprising approximately  $2.3 \times 10^4$  triangular surface meshes. Surface temperatures were calculated on the triangular surface elements, as shown in Fig. 6, with shortwave fluxes resolved by a Monte Carlo ray-tracing scheme using  $1 \times 10^5$  photons. The solar position is updated at 30-min intervals to capture both diurnal and shading variations. Transient heat conduction simulations were performed for 24 h with a 10-min time step (600 s) on 29 January 2021, consistent with the validation case. Downward solar radiation, longwave radiation, wind speed, and air temperature were prescribed from the SOMUCH measurements.

The simulation ran on a local workstation with an NVIDIA RTX 5090D GPU and completed in 26.6 h, comprising a view-factor calculation (4.2 h), solar-radiation computation (22.2 h), and coupled heat-transfer analysis (0.2 h).

For this demonstration, material-specific reflectance was neglected and a uniform albedo of 0.24 was applied to all urban surfaces. Walls and roofs were modeled as three concrete layers of 0.10 m each (total thickness = 0.30 m), while the ground comprised 0.35 m (0.15 m + 0.15 m + 0.05 m) with an adiabatic bottom boundary. For all layers, thermal properties were fixed to concrete values of thermal conductivity  $k = 2.0 \text{ W m}^{-1}\text{K}^{-1}$ , density  $\rho = 2420 \text{ kg m}^{-3}$ , and specific heat capacity  $c_p = 618 \text{ J kg}^{-1}\text{K}^{-1}$ . All model inputs are consolidated into a single YAML configuration file, which specifies the simulation parameters, weather forcing, geometry paths, surface albedo, and material thermal properties for easy reproducibility. The walls, roofs, and ground are assumed to be constructed by three layers of concrete.

586 ~~The layer thickness of walls and roofs is 10 cm. The total thickness of the ground is 35cm, with an~~  
587 ~~adiabatic bottom boundary.~~ The buildings are assumed to be naturally ventilated, with the indoor and  
588 outdoor air temperatures being the same. The thermal characteristics of concrete are assumed to be the  
589 same as in the SOMUCH experiment.

590 The surface temperatures are calculated in three steps: 1) calculate the solar radiative flux of each point  
591 by rMCRT; 2) calculate the view factors between the elements using rMCRT; 3) calculate the surface  
592 temperatures using Monte Carlo random walking. All three steps are processed in parallel on GPU. The  
593 weather data measured on 29th Jan 2021 during the SOMUCH experiment is used as the driving input.  
594 The surface temperatures are calculated from 0:00 to 24:00, with a time step of 30 minutes.

595 The simulation results were exported in vtk format and visualized using ParaView. Fig. 14 presents the  
596 surface temperature distributions at 09:00, 11:00, 13:00, 15:00, 17:00, and 19:00. The movement of  
597 building shadows and their influence on surface temperatures are clearly visible in these contours,  
598 illustrating the diurnal heating and cooling cycle. These visualizations demonstrate that the model can  
599 represent complex building geometries and can be applied to real urban environments.

600 The energy balance analysis of the SOMUCH experiment indicates that convective heat transfer plays  
601 only a minor role. However, due to the experiment's reduced scale and limited local wind speeds, it  
602 remains uncertain whether this conclusion holds at full scale or under higher wind speed conditions.

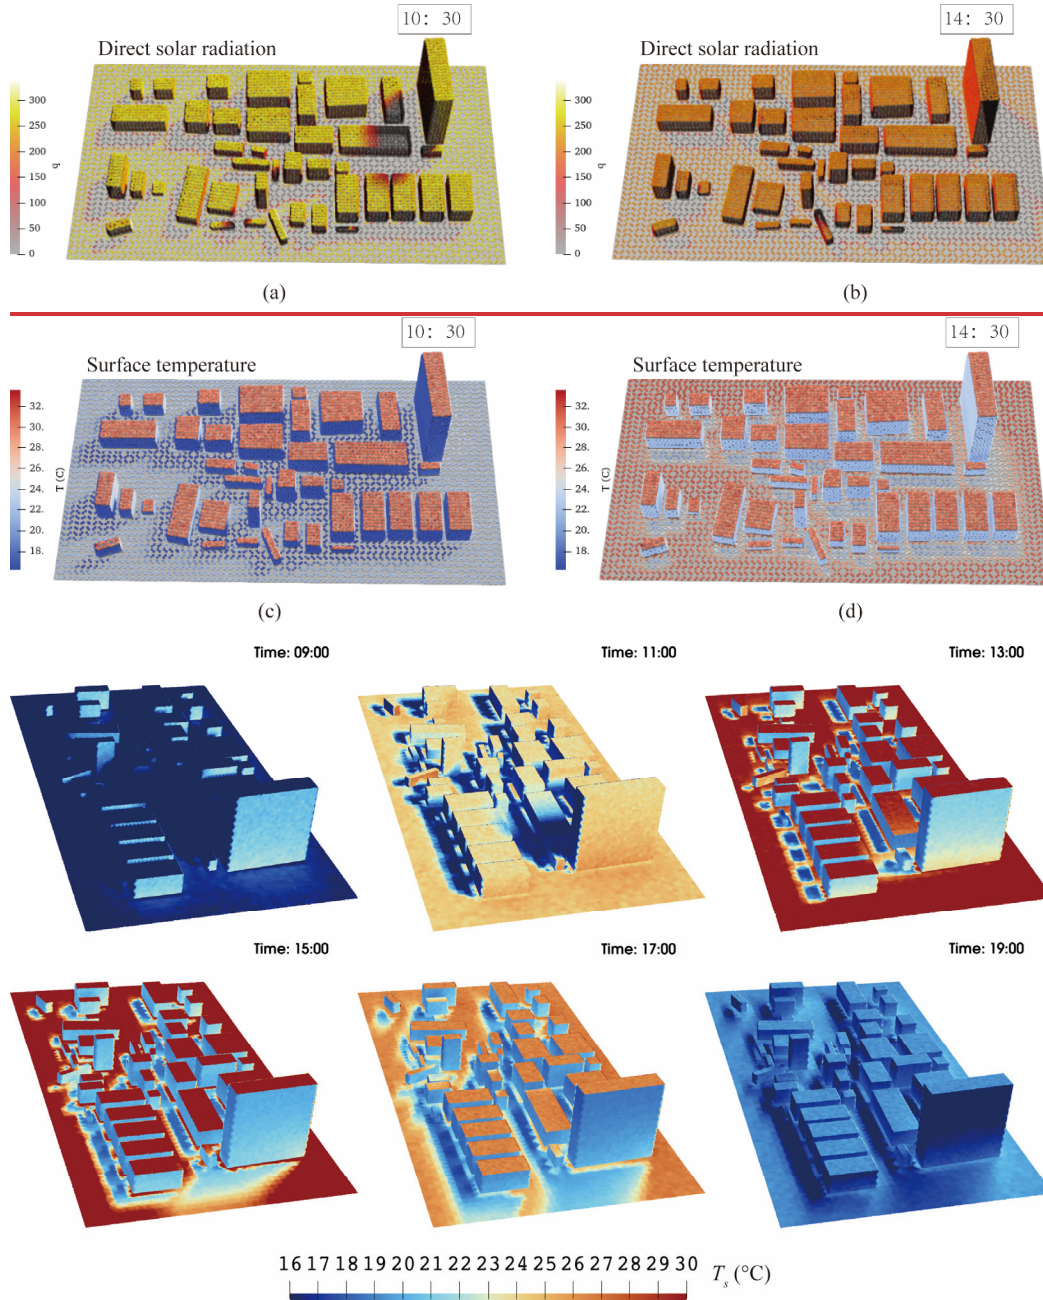

**Figure 1214: Radiation and temperature**—Simulation results show the evolution of surface temperature for the complex building geometries at 09:00, 11:00, 13:00, 15:00, 17:00, and 19:00. These snapshots capture the diurnal heating and cooling cycle, highlighting morning warming, peak midday temperatures, and the evening decline. Simulation results for complex building geometries. The direct shortwave radiation at 10:30 (a) and 14:30 (b). The surface temperatures at 10:30 (c) and 14:30 (d).

610 The simulation results are output in `.vtk` format and visualized using ParaView. Fig. 12 shows the direct  
 611 shortwave radiation and surface temperatures at 10:30 and 14:30. The movement of building shadows  
 612 and their impact on surface temperatures are clearly observed in these contours. These contours  
 613 demonstrate that this model can be applied to complex buildings in real urban areas. To further assess the  
 614 role of the convective model, a wind sensitivity analysis was performed for the real urban configuration.  
 615 The baseline wind speed ( $WF = 1.0$ ) was measured on 29 January 2021, the same day used for the  
 616 validation cases. Wind speeds were then systematically increased by factors of 2.0 and 5.0 relative to the  
 617 baseline to evaluate their influence on urban surface temperatures. The resulting average surface  
 618 temperatures of the ground, walls, and roof are shown on Fig. 15. The temperature evolution in Fig. 15  
 619 (a)–(c) demonstrates that increasing the wind factor from  $WF = 1.0$  to 5.0 progressively lowers surface  
 620 temperatures across all urban elements. Fig. 15 (d) quantifies the temperature differences relative to the  
 621 baseline scenario ( $WF = 1.0$ ), revealing cooling effects of up to 6 °C, with the most pronounced  
 622 reductions occurring during peak heating hours. Among the three surfaces, the roof exhibits the greatest  
 623 sensitivity to wind variations, followed by the ground and then the walls.  
 624 These results highlight that, at full scale and under high-wind conditions, convective processes can exert  
 625 a much stronger influence on urban surface temperatures than indicated by the scaled SOMUCH  
 626 experiment. Therefore, future studies are needed to better quantify and model convective effects across  
 627 a broader range of wind speeds and length scales. Moreover, under weak-wind conditions, natural  
 628 convection becomes especially important, particularly when the temperature difference between the wall  
 629 and the atmosphere grows large (Fan et al., 2021; Mei and Yuan, 2021). However, this natural-convective  
 630 effect may not be significant in the scaled SOMUCH experiment.



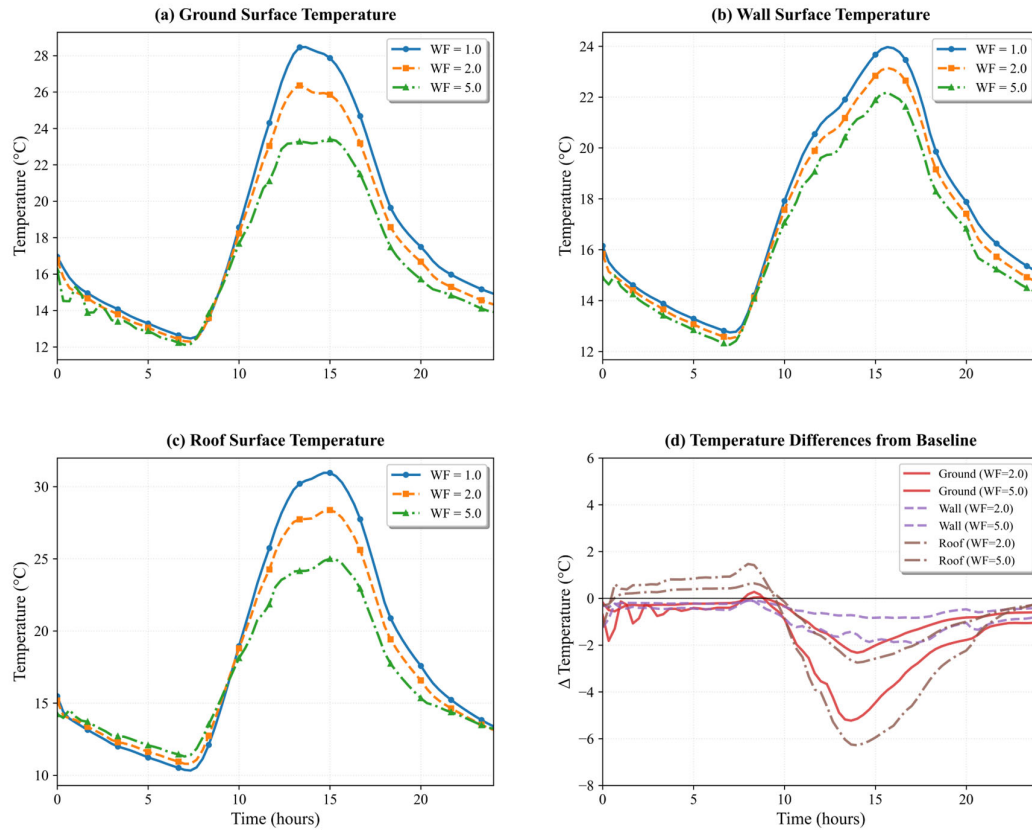

**Figure 15. Wind-sensitivity analysis of urban surface temperatures showing (a) ground, (b) wall, and (c) roof temperature evolution under different wind factors (WF = 1.0, 2.0, 5.0), and (d) temperature differences relative to the baseline (WF = 1.0). The baseline wind speed was measured on 29 January 2021, the same day used for the model-validation cases.**

## 5. Limitations and future work

This model is a building-resolved urban surface temperature model, focusing on detailed neighborhood-scale processes. Therefore, its application to full city-scale simulations remains limited by computational cost and is currently best suited for neighborhood-scale. The first version focuses on the complex

radiative exchange in densely built urban areas. The parameters and assumptions are validated against the idealized scaled outdoor experiment, which uses homogeneous building materials with consistent albedo and thermal characteristics. Glazing and green infrastructure are not included in this experiment. The SOMUCH project is currently measuring the impact of glass and green infrastructure. The next version will expand its capabilities to capture complex urban materials, such as urban trees, green walls,



645 and glass curtain walls, to better represent real urban configurations. Other limitations include:

- 646 • All reflections are assumed to be Lambertian. While this assumption works well for the SOMUCH  
647 measurements, where concrete is used for all urban surfaces, it may not fully capture the reflective  
648 properties of other materials with different surface textures, such as glass or vegetation.
- 649 • The high-resolution wall temperature simulation still requires a significant amount of time to  
650 complete, even with parallel computation on GPUs. This is due to the large number of rays ( $N =$   
651  $10^6$ ) required for accurate solar radiation modeling. For each point, the simulation takes about 1  
652 second to finish. However, as the number of test points increases, the overall computational time  
653 grows substantially.
- 654 • The dynamic indoor air temperature is not included in this model. It assumes that the indoor air  
655 temperature is equal to the outdoor air temperature for a natural ventilated room. This assumption  
656 may lead to discrepancies, particularly in situations where indoor temperatures differ from outdoor  
657 conditions due to factors such as heat sources, insulation, or limited ventilation.
- 658 • The participation of the urban atmosphere is ignored in this study. In the scaled measurements,  
659 longwave radiation travels much shorter distances to adjacent surfaces, which reduces the influence  
660 of atmospheric effects compared to real-world urban environments.

## 661 **6. Conclusions**

662 ~~This study introduces a GPU-accelerated Urban Surface Temperature model (GUST), which solves the~~  
663 ~~conduction-radiation-convection-coupled heat transfer using Monte Carlo method. The GPU parallel~~  
664 ~~computing is adopted to address the large computational demands of Monte Carlo method. This model~~  
665 ~~is validated with a scaled outdoor experiment (SOMUCH), which has a high spatial and temporal~~  
666 ~~resolution.~~ This study introduces a GPU-accelerated Urban Surface Temperature model (GUST), which  
667 computes radiation using Monte Carlo ray tracing and solves heat conduction with a one-dimensional  
668 Monte Carlo random-walk approach. To meet the substantial computational demands of these Monte  
669 Carlo simulations, the model employs GPU-based parallel computing for efficient processing. GUST is  
670 validated against the high-resolution, scaled outdoor experiment SOMUCH, which provides detailed  
671 spatial and temporal measurements.

672 The radiative heat flux is simulated using a reverse Monte Carlo Ray Tracing method, which allows for  
673 the accurate reproduction of multiple reflections in high-density urban areas. The sensitivity test shows  
674 that  $10^5 \sim 10^6$  rays are required for each point to accurately model the ~~shortwavesolar~~ radiation. This  
675 large amount of ray tracing can only be achieved using GPU parallel computing. The Monte Carlo  
676 method is also used to solve the couple heat transfer using random walking algorithms, which is suitable  
677 for GPU-based coding.

678 The comparison with the SOMUCH experiment shows that the transient surface temperatures on roofs,  
679 walls and the ground are well reproduced. A relatively large discrepancy is observed in cases with high  
680 building density, where the wall temperatures are highly sensitive to convective and longwave radiative  
681 fluxes. The surface energy balance analysis shows that longwave radiation exchange between urban  
682 surfaces plays a critical role across all building densities. In contrast, convective heat flux only plays a  
683 significant role in high-density cases. In future versions, the simulation of convective heat flux could be  
684 improved by simulating urban airflow.

685 Lastly, this model is implemented to solve the surface temperatures on complex urban buildings, which  
686 are composed of a total of  $2.3 \times 10^4$  surface elements. The GPU allows simultaneous simulation of  
687 heat transfer and view factors across all elements, enabling high-fidelity simulations in real urban  
688 configurations with complex geometries. The current version focuses on the radiation-conduction-  
689 convection coupled heat transfer coupled in complex geometries. Future developments will prioritize the  
690 integration of complex glazing systems and green infrastructure in urban environments.

691

## 692 **Code availability**

693 ~~The SOMUCH measurement data is available upon request. The development of GUST, model validation,~~  
694 ~~and visualization in this study were conducted using Python 3.8 with CUDA. The source code, supporting~~  
695 ~~data, and simulation results presented in this paper are archived on Zenodo at~~  
696 ~~<https://doi.org/10.5281/zenodo.15074365> (Mei, 2025). Users are requested to contact the corresponding~~  
697 ~~authors to obtain access to the code free of charge for research purposes under a collaboration agreement~~  
698 ~~(meishi@mail.sysu.edu.cn). The SOMUCH measurement data are available upon request. The~~

699 development of GUST, model validation, and visualization in this study were conducted using Python  
700 3.8 with CUDA. The source code, supporting data, and simulation results presented in this paper are  
701 archived on Zenodo at <https://doi.org/10.5281/zenodo.17138571> and are freely accessible for research  
702 purposes under the Creative Commons Attribution 4.0 International (CC BY 4.0) license.

703

#### 704 **Author contributions**

705 SM designed the study, developed the code, conducted the analysis. SM and GC prepared the manuscript  
706 draft. GC and JH collected and shared SOMUCH measurements for the purpose of model validation. GC,  
707 JH and TS supported the model implementation and data analysis. All have read and accepted the  
708 manuscript for submission.

709

#### 710 **Acknowledgement**

711 This research is supported by National Natural Science Foundation of China (Grant No. 42305076,  
712 W2421048, U2442212), Natural Science Foundation of Guangdong Province, China (Grant No.  
713 2024A1515010173) and Overseas Postdoctoral Talents 2023 Programme (Grant No. BH2023009). Dr.  
714 Shuo-Jun Mei and Dr. Ting Sun are supported by an International Exchanges grant from the Royal  
715 Society (Grant No. IEC\NSFC\242040) and National Natural Science Foundation of China (Grant No.  
716 W2421048).

717

#### 718 **Appendix A. Indoor and outdoor air temperatures in SOMUCH measurement**

719 The indoor and outdoor air temperatures at different levels in the SOMUCH measurement are plotted in  
720 Fig. A1. These air temperatures serve as input data for the validation cases.

(a)  $H/W = 1$

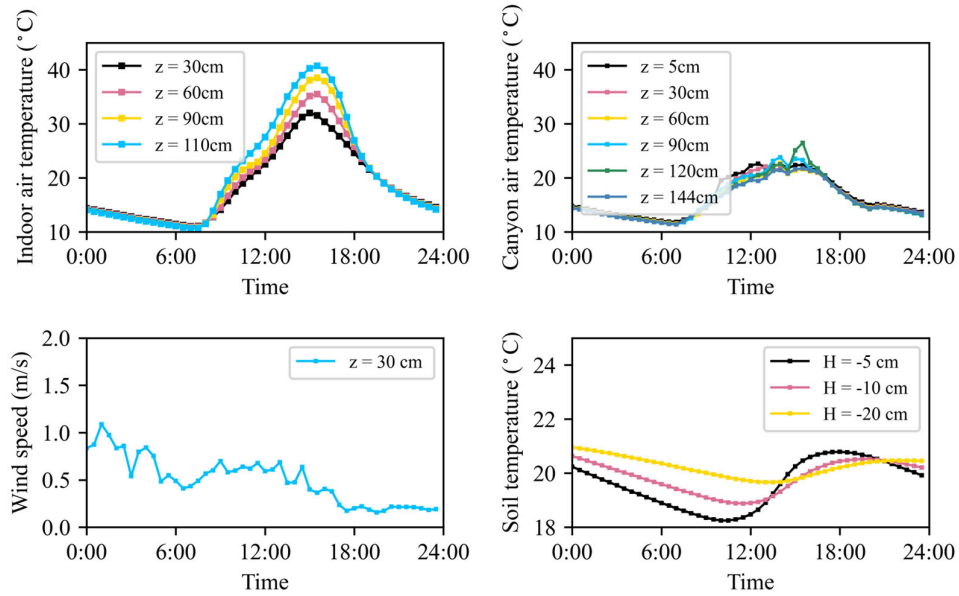

721

(b)  $H/W = 2$

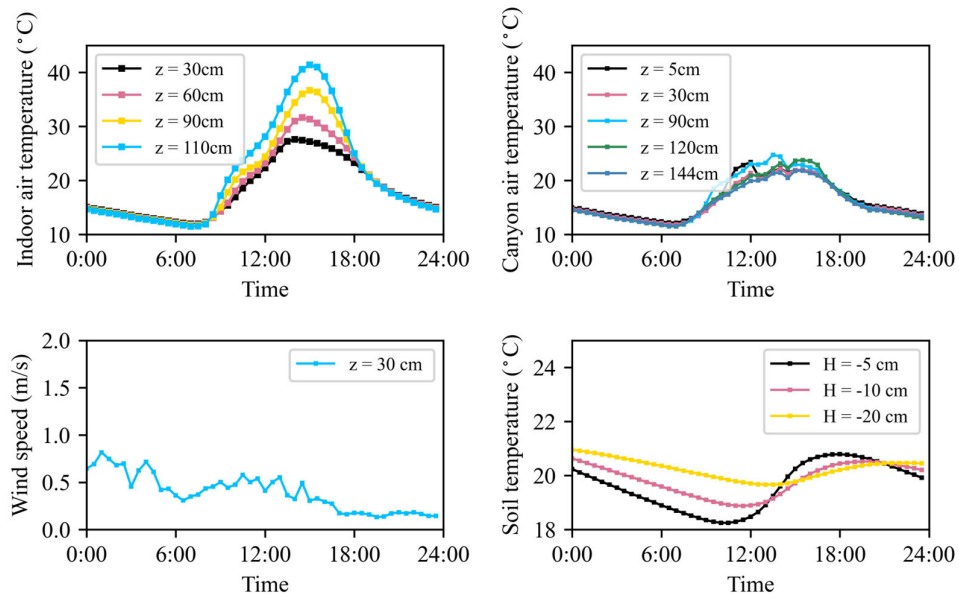

722

(c)  $H/W = 3$

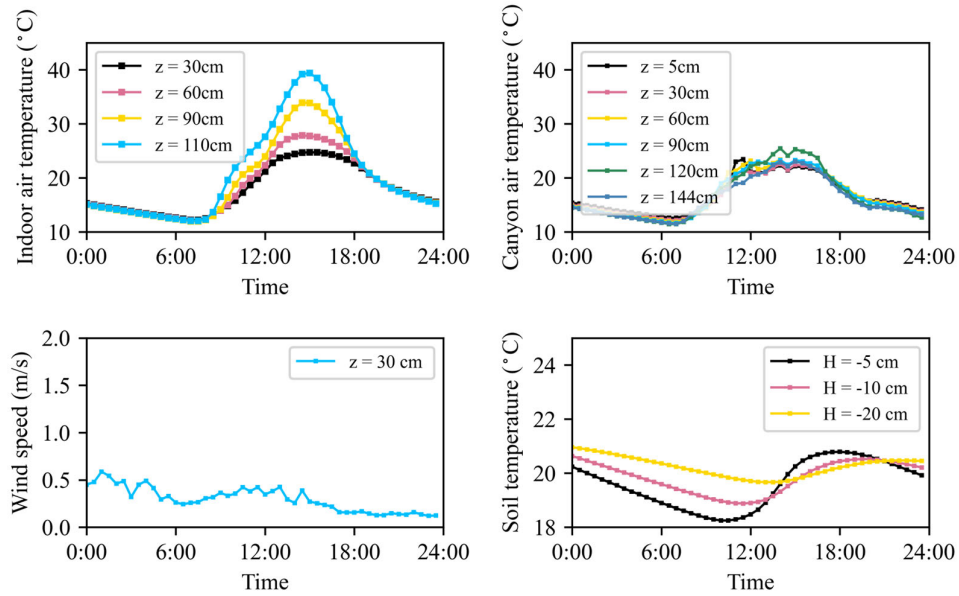

723

(d)  $H/W = 6$

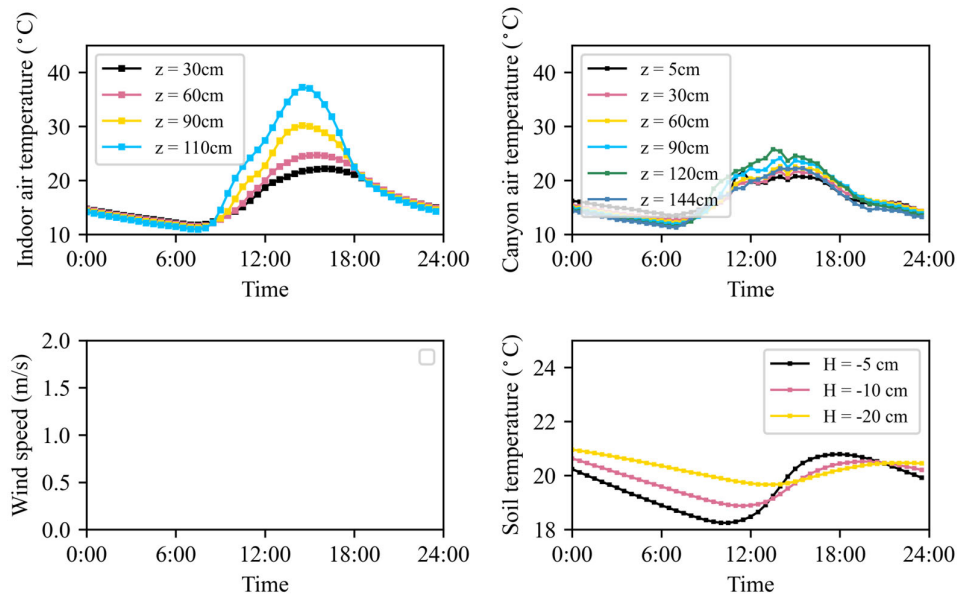

724

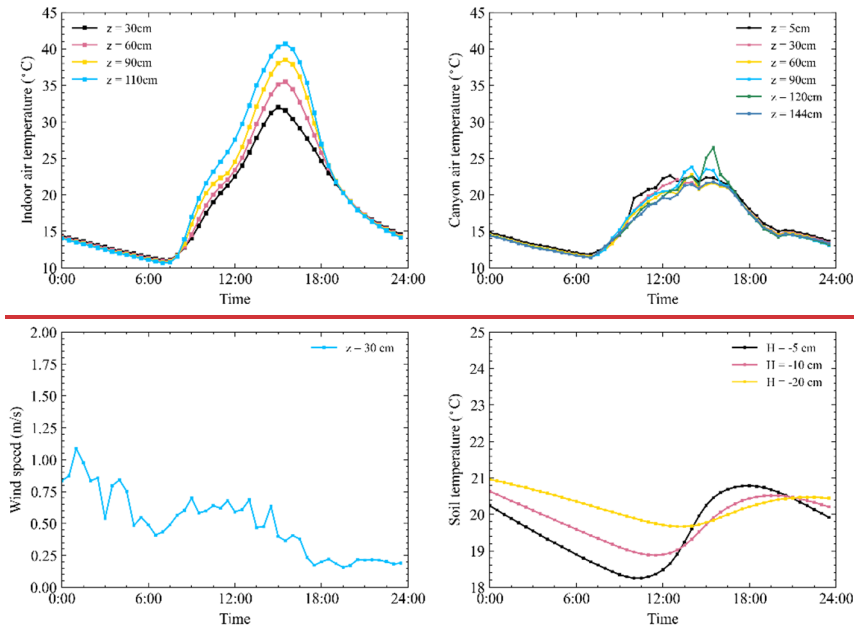

(a)  $H/W=1$

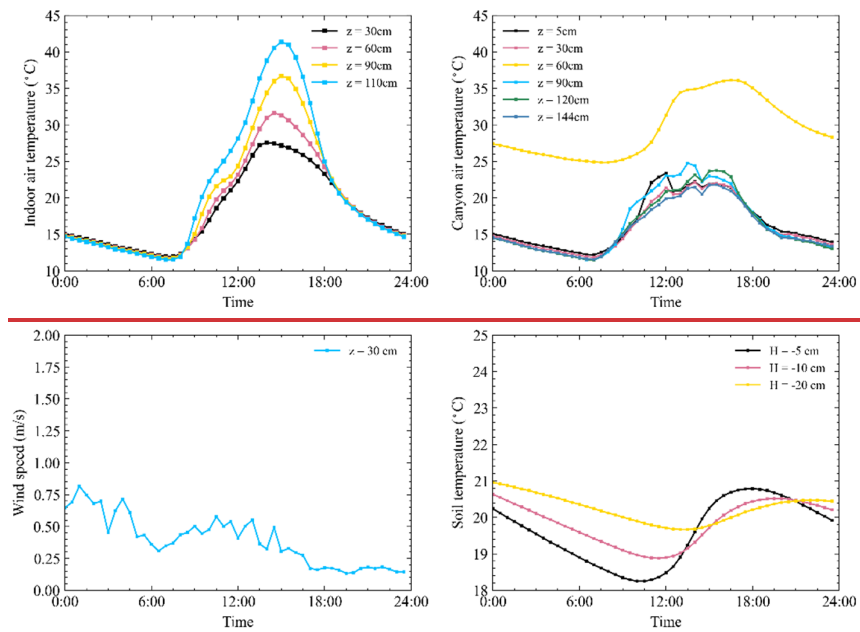

(b)  $H/W=2$

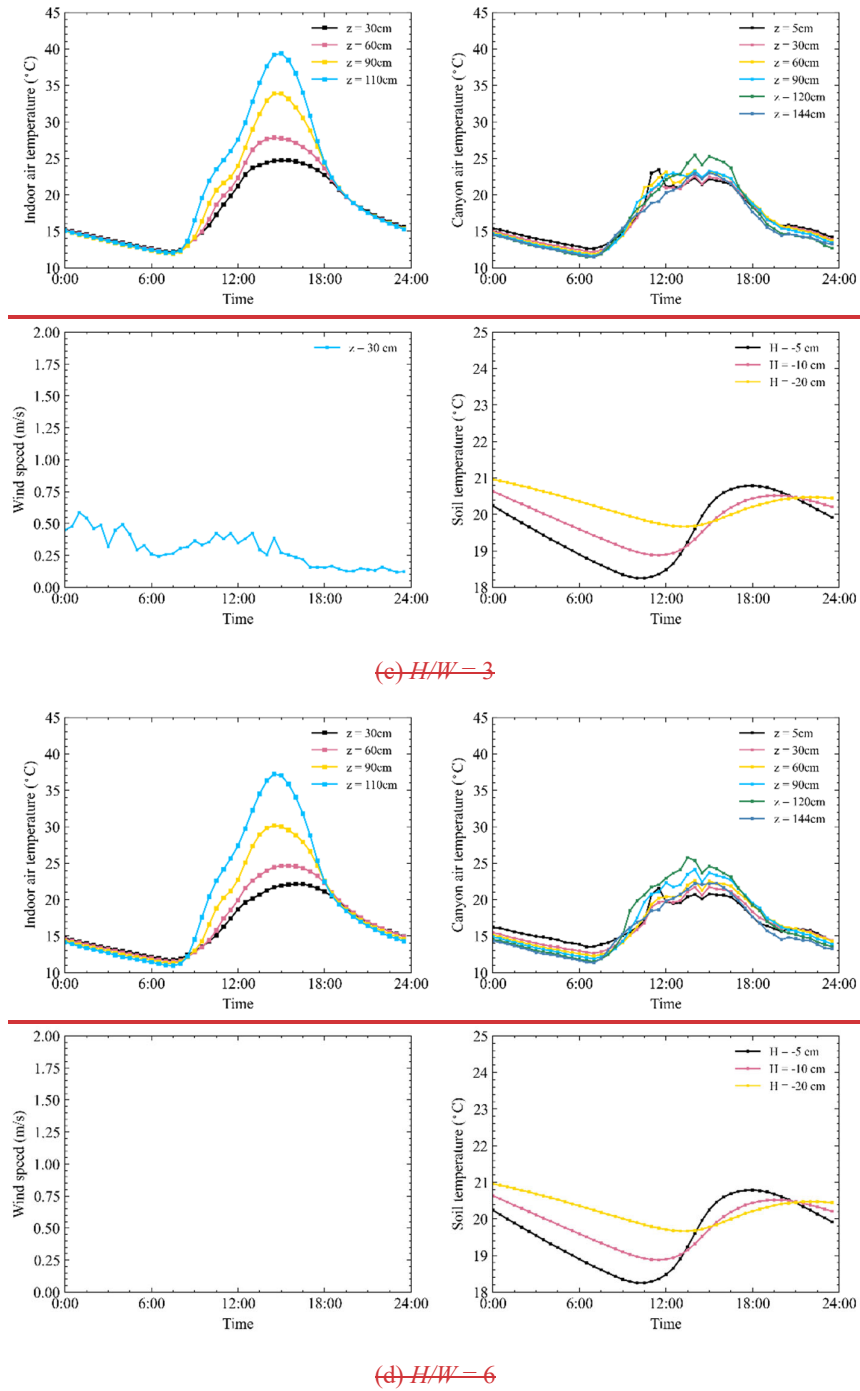

**Figure A1: Indoor, outdoor air temperatures, and wind speeds in street canyons that are measured on 29<sup>th</sup> Jan 2021. The wind speeds in the street canyon of  $H/W = 6$  were not measured because the sonic anemometer cannot be installed in such a narrow street. The outdoor air temperatures measured at  $z = 60$  cm in  $H/W = 2$  are unusual, due to an instrument failure.**

## Appendix B. Sensitivity test for other days

To further validate the model, we also compared the simulated roof temperatures with measurements over three consecutive days, from 30 January to 1 February 2021, similar to the analysis presented in Fig. 8. The results are shown in Fig. A2, which demonstrates excellent agreement between simulated and observed roof temperatures. By using multiple consecutive days, this comparison minimizes potential bias arising from the single day's weather conditions.

### (a) 30<sup>th</sup> Jan 2021

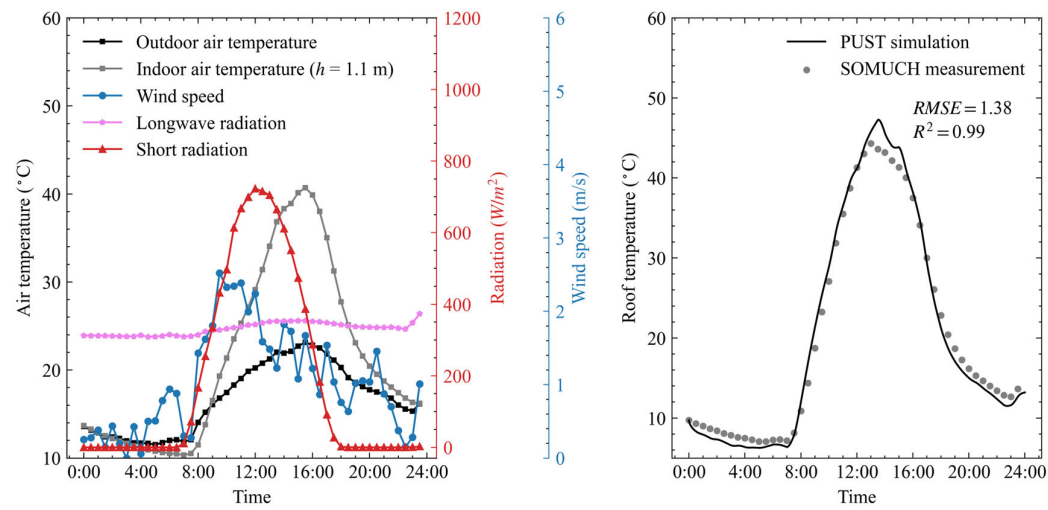

### (b) 31<sup>st</sup> Jan 2021

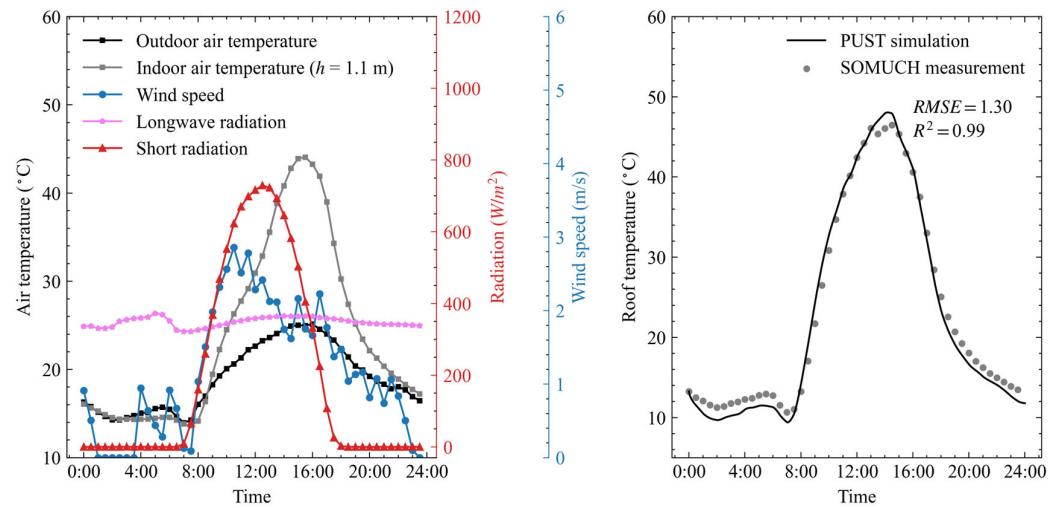



(c) 1<sup>st</sup> Feb 2021

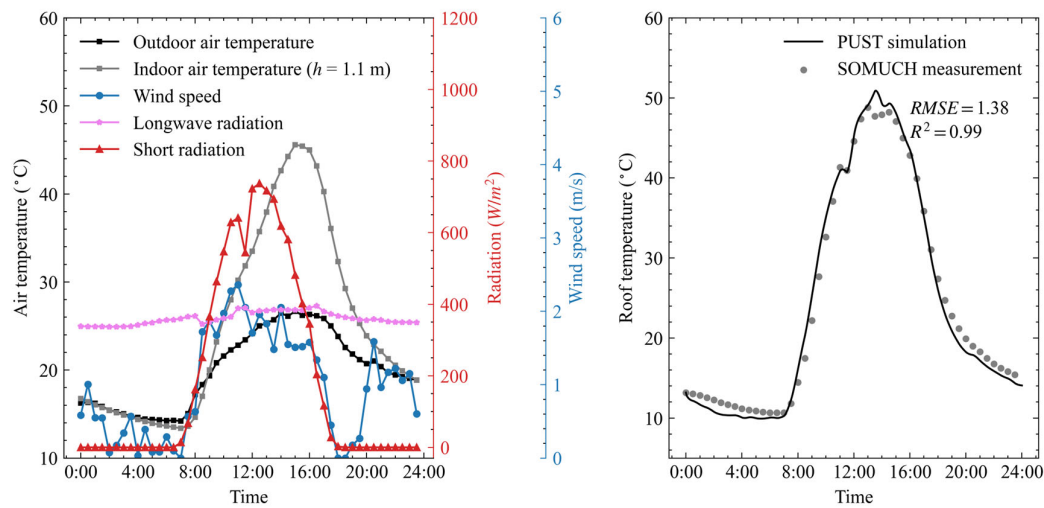

**Figure A2: Weather data from 30 January to 1 February 2021 are shown in the left panels. The right panels compare roof-surface temperatures from simulation and measurement, with points representing observations and lines representing simulated values.**

## References

- Bentham, T. and Britter, R.: Spatially averaged flow within obstacle arrays, *Atmospheric Environment*, 37, 2037-2043, [https://doi.org/10.1016/S1352-2310\(03\)00123-7](https://doi.org/10.1016/S1352-2310(03)00123-7), 2003.
- Caliot, C., d'Alençon, L., Blanco, S., Forest, V., Fournier, R., Hourdin, F., Retailleau, F., Schoetter, R., and Villefranche, N.: Coupled heat transfers resolution by Monte Carlo in urban geometry including direct and diffuse solar irradiances, *International Journal of Heat and Mass Transfer*, 222, 125139, <https://doi.org/10.1016/j.ijheatmasstransfer.2023.125139>, 2024.
- Carmeliet, J. and Derome, D.: How to beat the heat in cities through urban climate modelling, *Nature Reviews Physics*, 6, 2-3, 10.1038/s42254-023-00673-1, 2024.
- Chen, G., Mei, S.-J., Hang, J., Li, Q., and Wang, X.: URANS simulations of urban microclimates: Validated by scaled outdoor experiments, *Building and Environment*, 272, 112691, <https://doi.org/10.1016/j.buildenv.2025.112691>, 2025.
- Ebi, K. L., Capon, A., Berry, P., Broderick, C., de Dear, R., Havenith, G., Honda, Y., Kovats, R. S., Ma, W., Malik, A., Morris, N. B., Nybo, L., Seneviratne, S. I., Vanos, J., and Jay, O.: Hot weather and heat extremes: health risks, *The Lancet*, 398, 698-708, [https://doi.org/10.1016/S0140-6736\(21\)01208-3](https://doi.org/10.1016/S0140-6736(21)01208-3), 2021.
- Eingrüber, N., Domm, A. S., Korres, W., and Schneider, K.: Simulation of the heat mitigation potential of unsealing measures in cities by parameterizing grass grid pavers for urban microclimate modelling

770 with ENVI-met (V5), EGU sphere, 2024, 1-25, 10.5194/egusphere-2024-697, 2024.

771 Fan, Y., Zhao, Y., Torres, J. F., Xu, F., Lei, C., Li, Y., and Carmeliet, J.: Natural convection over vertical  
 772 and horizontal heated flat surfaces: A review of recent progress focusing on underpinnings and  
 773 implications for heat transfer and environmental applications, *Physics of Fluids*, 33, 101301,  
 774 10.1063/5.0065125, 2021.

775 Feng, J., Gao, K., Khan, H., Ulpiani, G., Vasilakopoulou, K., Young Yun, G., and Santamouris, M.:  
 776 Overheating of Cities: Magnitude, Characteristics, Impact, Mitigation and Adaptation, and Future  
 777 Challenges, *Annual Review of Environment and Resources*, 48, 651-679,  
 778 <https://doi.org/10.1146/annurev-environ-112321-093021>, 2023.

779 Forouzandeh, A.: Prediction of surface temperature of building surrounding envelopes using holistic  
 780 microclimate ENVI-met model, *Sustainable Cities and Society*, 70, 102878,  
 781 <https://doi.org/10.1016/j.scs.2021.102878>, 2021.

782 Grimmond, C. S. B. and Oke, T. R.: Aerodynamic properties of urban areas derived from analysis of  
 783 surface form, *Journal of Applied Meteorology*, 38, 1262, 10.1175/1520-  
 784 0450(1999)038<1262:APOUAD>2.0.CO;2, 1999.

785 Grimmond, C. S. B., Blackett, M., Best, M. J., Barlow, J., Baik, J.-J., Belcher, S. E., Bohnenstengel, S.  
 786 I., Calmet, I., Chen, F., Dandou, A., Fortuniak, K., Gouvea, M. L., Hamdi, R., Hendry, M., Kawai,  
 787 T., Kawamoto, Y., Kondo, H., Krayenhoff, E. S., Lee, S.-H., Loridan, T., Martilli, A., Masson, V.,  
 788 Miao, S., Oleson, K., Pigeon, G., Porson, A., Ryu, Y.-H., Salamanca, F., Shashua-Bar, L., Steeneveld,  
 789 G.-J., Tombrou, M., Voogt, J., Young, D., and Zhang, N.: The International Urban Energy Balance  
 790 Models Comparison Project: First Results from Phase 1, *Journal of Applied Meteorology and*  
 791 *Climatology*, 49, 1268-1292, <https://doi.org/10.1175/2010JAMC2354.1>, 2010.

792 Grimmond, C. S. B., Blackett, M., Best, M. J., Baik, J.-J., Belcher, S. E., Beringer, J., Bohnenstengel, S.  
 793 I., Calmet, I., Chen, F., Coutts, A., Dandou, A., Fortuniak, K., Gouvea, M. L., Hamdi, R., Hendry,  
 794 M., Kanda, M., Kawai, T., Kawamoto, Y., Kondo, H., Krayenhoff, E. S., Lee, S.-H., Loridan, T.,  
 795 Martilli, A., Masson, V., Miao, S., Oleson, K., Ooka, R., Pigeon, G., Porson, A., Ryu, Y.-H.,  
 796 Salamanca, F., Steeneveld, G. J., Tombrou, M., Voogt, J. A., Young, D. T., and Zhang, N.: Initial  
 797 results from Phase 2 of the international urban energy balance model comparison, *International*  
 798 *Journal of Climatology*, 31, 244-272, <https://doi.org/10.1002/joc.2227>, 2011.

799 Hang, J. and Chen, G.: Experimental study of urban microclimate on scaled street canyons with various  
 800 aspect ratios, *Urban Climate*, 46, 101299, <https://doi.org/10.1016/j.uclim.2022.101299>, 2022.

801 Hang, J., Zeng, L., Li, X., and Wang, D.: Evaluation of a single-layer urban energy balance model using  
 802 measured energy fluxes by scaled outdoor experiments in humid subtropical climate, *Building and*  
 803 *Environment*, 254, 111364, <https://doi.org/10.1016/j.buildenv.2024.111364>, 2024.

804 Hang, J., Lu, M., Ren, L., Dong, H., Zhao, Y., and Zhao, N.: Cooling performance of near-infrared and  
 805 traditional high-reflective coatings under various coating modes and building area densities in 3D  
 806 urban models: Scaled outdoor experiments, *Sustainable Cities and Society*, 121, 106200,  
 807 <https://doi.org/10.1016/j.scs.2025.106200>, 2025.

808 Hénon, A., Mestayer, P. G., Lagouarde, J.-P., and Voogt, J. A.: An urban neighborhood temperature and  
809 energy study from the CAPITOUL experiment with the Solene model, *Theoretical and Applied*  
810 *Climatology*, 110, 197-208, 10.1007/s00704-012-0616-z, 2012.

811 Imbert, C., Bhattacharjee, S., and Tencar, J.: Simulation of urban microclimate with SOLENE-  
812 microclimat: an outdoor comfort case study, *Proceedings of the Symposium on Simulation for*  
813 *Architecture and Urban Design*, Delft, Netherlands 2018.

814 Kondo, A., Ueno, M., Kaga, A., and Yamaguchi, K.: The Influence Of Urban Canopy Configuration On  
815 Urban Albedo, *Boundary-Layer Meteorology*, 100, 225-242, 10.1023/A:1019243326464, 2001.

816 Krayenhoff, E. S. and Voogt, J. A.: A microscale three-dimensional urban energy balance model for  
817 studying surface temperatures, *Boundary-Layer Meteorology*, 123, 433-461, 10.1007/s10546-006-  
818 9153-6, 2007.

819 Manoli, G., Fatichi, S., Schlöpfer, M., Yu, K., Crowther, T. W., Meili, N., Burlando, P., Katul, G. G., and  
820 Bou-Zeid, E.: Magnitude of urban heat islands largely explained by climate and population, *Nature*,  
821 573, 55-60, 10.1038/s41586-019-1512-9, 2019.

822 Mei, S.-J. and Yuan, C.: Three-dimensional simulation of building thermal plumes merging in calm  
823 conditions: Turbulence model evaluation and turbulence structure analysis, *Building and*  
824 *Environment*, 203, 108097, <https://doi.org/10.1016/j.buildenv.2021.108097>, 2021.

825 Mei, S.-J., Chen, G., Wang, K., and Hang, J.: Parameterizing urban canopy radiation transfer using three-  
826 dimensional urban morphological parameters, *Urban Climate*, 60, 102363,  
827 <https://doi.org/10.1016/j.uclim.2025.102363>, 2025.

828 Nice, K.: Development, validation, and demonstration of the VTUF-3D v1.0 urban micro-climate model  
829 to support assessments of urban vegetation influences on human thermal comfort, *School of Earth,*  
830 *Atmosphere and Environment*, Monash University, 2016.

831 Owens, S. O., Majumdar, D., Wilson, C. E., Bartholomew, P., and van Reeuwijk, M.: A conservative  
832 immersed boundary method for the multi-physics urban large-eddy simulation model uDALES v2.0,  
833 *Geoscientific Model Development*, 17, 6277-6300, 10.5194/gmd-17-6277-2024, 2024.

834 Reindl, D. T., Beckman, W. A., and Duffie, J. A.: Diffuse fraction correlations, *Solar Energy*, 45, 1-7,  
835 [https://doi.org/10.1016/0038-092X\(90\)90060-P](https://doi.org/10.1016/0038-092X(90)90060-P), 1990.

836 Resler, J., Krc, P., Belda, M., Jurus, P., Benesova, N., Lopata, J., Vlcek, O., Damaskova, D., Eben, K.,  
837 Derbek, P., Maronga, B., and Kanani-Suhring, F.: PALM-USM v1.0: A new urban surface model  
838 integrated into the PALM large-eddy simulation model, *Geoscientific Model Development*, 10, 3635-  
839 3659, 10.5194/gmd-10-3635-2017, 2017.

840 Rodriguez, A., Lecigne, B., Wood, S., Carmeliet, J., Kubilay, A., and Derome, D.: Optimal representation  
841 of tree foliage for local urban climate modeling, *Sustainable Cities and Society*, 115, 105857,  
842 <https://doi.org/10.1016/j.scs.2024.105857>, 2024.

843 Salim, M. H., Schlünzen, K. H., Grawe, D., Boettcher, M., Gierisch, A. M. U., and Fock, B. H.: The  
844 microscale obstacle-resolving meteorological model MITRAS v2.0: model theory, *Geoscientific*

Model Development, 11, 3427-3445, 10.5194/gmd-11-3427-2018, 2018.

Schoetter, R., Caliot, C., Chung, T.-Y., Hogan, R. J., and Masson, V.: Quantification of Uncertainties of Radiative Transfer Calculation in Urban Canopy Models, *Boundary-Layer Meteorology*, 189, 103-138, 10.1007/s10546-023-00827-9, 2023.

Talebi, S., Gharehbash, K., and Jalali, H. R.: Study on random walk and its application to solution of heat conduction equation by Monte Carlo method, *Progress in Nuclear Energy*, 96, 18-35, <https://doi.org/10.1016/j.pnucene.2016.12.004>, 2017.

Toparlar, Y., Blocken, B., Vos, P., van Heijst, G. J. F., Janssen, W. D., van Hooff, T., Montazeri, H., and Timmermans, H. J. P.: CFD simulation and validation of urban microclimate: A case study for Bergpolder Zuid, Rotterdam, *Building and Environment*, 83, 79-90, <https://doi.org/10.1016/j.buildenv.2014.08.004>, 2015.

Tregan, J. M., Amestoy, J. L., Bati, M., Bezian, J.-J., Blanco, S., Brunel, L., Caliot, C., Charon, J., Cornet, J.-F., Coustet, C., d'Alençon, L., Dauchet, J., Dutour, S., Eibner, S., El Hafi, M., Eymet, V., Farges, O., Forest, V., Fournier, R., Galtier, M., Gattepaille, V., Gautrais, J., He, Z., Hourdin, F., Ibarrart, L., Joly, J.-L., Lapeyre, P., Lavieille, P., Lecureux, M.-H., Lluc, J., Miscevic, M., Mourtoday, N., Nyffenegger-Péré, Y., Pelissier, L., Penazzi, L., Piaud, B., Rodrigues-Viguer, C., Roques, G., Roger, M., Saez, T., Terrée, G., Villefranque, N., Vourc'h, T., and Yaacoub, D.: Coupling radiative, conductive and convective heat-transfers in a single Monte Carlo algorithm: A general theoretical framework for linear situations, *PLoS One*, 18, e0283681, 10.1371/journal.pone.0283681, 2023.

Tuholske, C., Caylor, K., Funk, C., Verdin, A., Sweeney, S., Grace, K., Peterson, P., and Evans, T.: Global urban population exposure to extreme heat, *Proceedings of the National Academy of Sciences of the United States of America*, 118, e2024792118, doi:10.1073/pnas.2024792118, 2021.

Villefranque, N., Hourdin, F., d'Alençon, L., Blanco, S., Boucher, O., Caliot, C., Coustet, C., Dauchet, J., El Hafi, M., Eymet, V., Farges, O., Forest, V., Fournier, R., Gautrais, J., Masson, V., Piaud, B., and Schoetter, R.: The “teapot in a city”: A paradigm shift in urban climate modeling, *Science Advances*, 8, eabp8934, doi:10.1126/sciadv.abp8934, 2022.

Voogt, J. A. and Oke, T. R.: Effects of urban surface geometry on remotely-sensed surface temperature, *International Journal of Remote Sensing*, 19, 895-920, 10.1080/014311698215784, 1998.

Wang, K., Li, Y., Li, Y., and Lin, B.: Stone forest as a small-scale field model for the study of urban climate, *International Journal of Climatology*, 38, 3723-3731, <https://doi.org/10.1002/joc.5536>, 2018.

Wang, W., Wang, X., and Ng, E.: The coupled effect of mechanical and thermal conditions on pedestrian-level ventilation in high-rise urban scenarios, *Building and Environment*, 191, 107586, <https://doi.org/10.1016/j.buildenv.2021.107586>, 2021.

Wu, Z., Shi, Y., Ren, L., and Hang, J.: Scaled outdoor experiments to assess impacts of tree evapotranspiration and shading on microclimates and energy fluxes in 2D street canyons, *Sustainable Cities and Society*, 108, 105486, <https://doi.org/10.1016/j.scs.2024.105486>, 2024.

Yang, X. and Li, Y.: Development of a Three-Dimensional Urban Energy Model for Predicting and

- 882 Understanding Surface Temperature Distribution, *Boundary-Layer Meteorology*, 149, 303-321,  
883 10.1007/s10546-013-9842-x, 2013.
- 884 Yang, X. and Li, Y.: The impact of building density and building height heterogeneity on average urban  
885 albedo and street surface temperature, *Building and Environment*, 90, 146-156,  
886 <https://doi.org/10.1016/j.buildenv.2015.03.037>, 2015.
- 887 Yoshida, K., Miwa, S., Yamaki, H., and Honda, H.: Analyzing the impact of CUDA versions on GPU  
888 applications, *Parallel Computing*, 120, 103081, <https://doi.org/10.1016/j.parco.2024.103081>, 2024.
- 889 Yuan, C., Adelia, A. S., Mei, S., He, W., Li, X.-X., and Norford, L.: Mitigating intensity of urban heat  
890 island by better understanding on urban morphology and anthropogenic heat dispersion, *Building  
891 and Environment*, 176, 106876, <https://doi.org/10.1016/j.buildenv.2020.106876>, 2020.
- 892 Yuan, C., Shan, R., Zhang, Y., Li, X.-X., Yin, T., Hang, J., and Norford, L.: Multilayer urban canopy  
893 modelling and mapping for traffic pollutant dispersion at high density urban areas, *Science of The  
894 Total Environment*, 647, 255-267, <https://doi.org/10.1016/j.scitotenv.2018.07.409>, 2019.

895
